# Supplementary material for: Efficient synthetic method for the preparation of allyl- and propargyl-epoxides by allylation and propargylation of α-haloketones with organozinc reagents
Source: Royal Society of Chemistry journal article supplement (doi:10.1039/c1ob06071f), 2011-11-03

## Supporting Information

### Efficient Synthetic Method of Allyl- and Propargyl-Epoxides by Allylation and Propargylation of $\alpha$ -Halo Ketones with Organozinc Reagents

Jie Pan, Min Zhang, Songlin Zhang\*

*Key Laboratory of Organic Synthesis of Jiangsu Province, College of Chemistry, Chemical Engineering and Materials Science, Dushu Lake Campus, Suzhou University, Suzhou, 215123, People's Republic of China.*

[zhangsl@suda.edu.cn](mailto:zhangsl@suda.edu.cn)

## H and <sup>13</sup>C NMR Spectra

(3a)

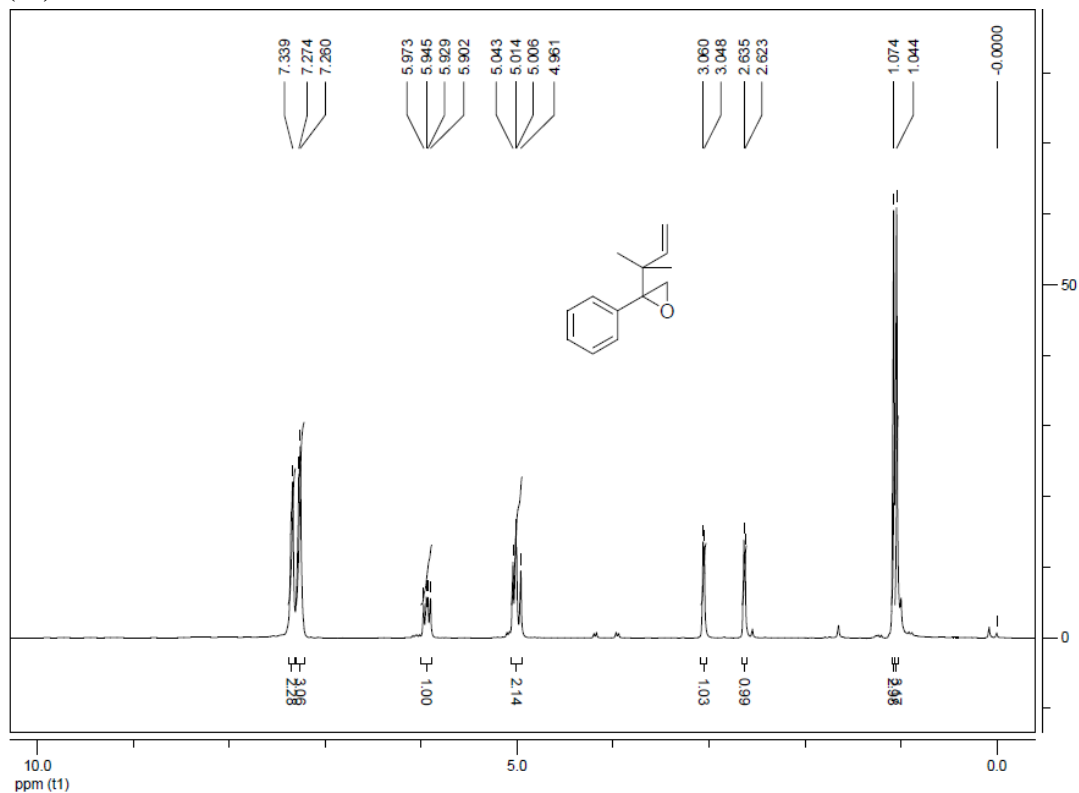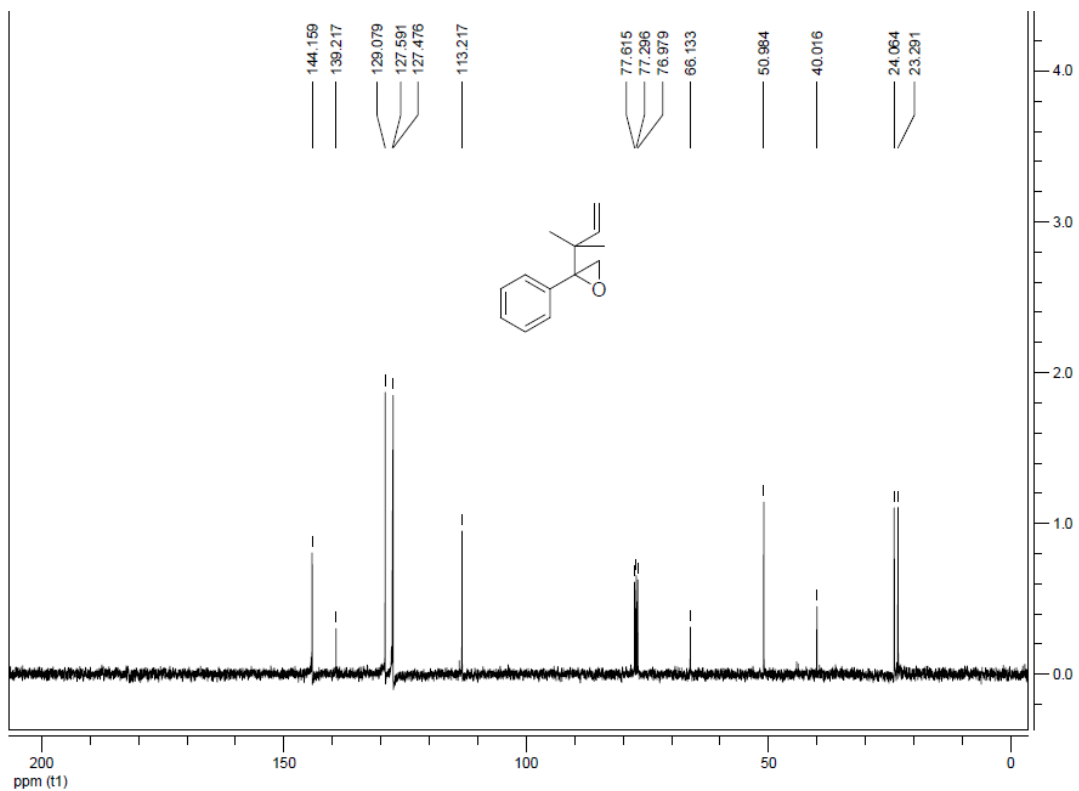

(4a)

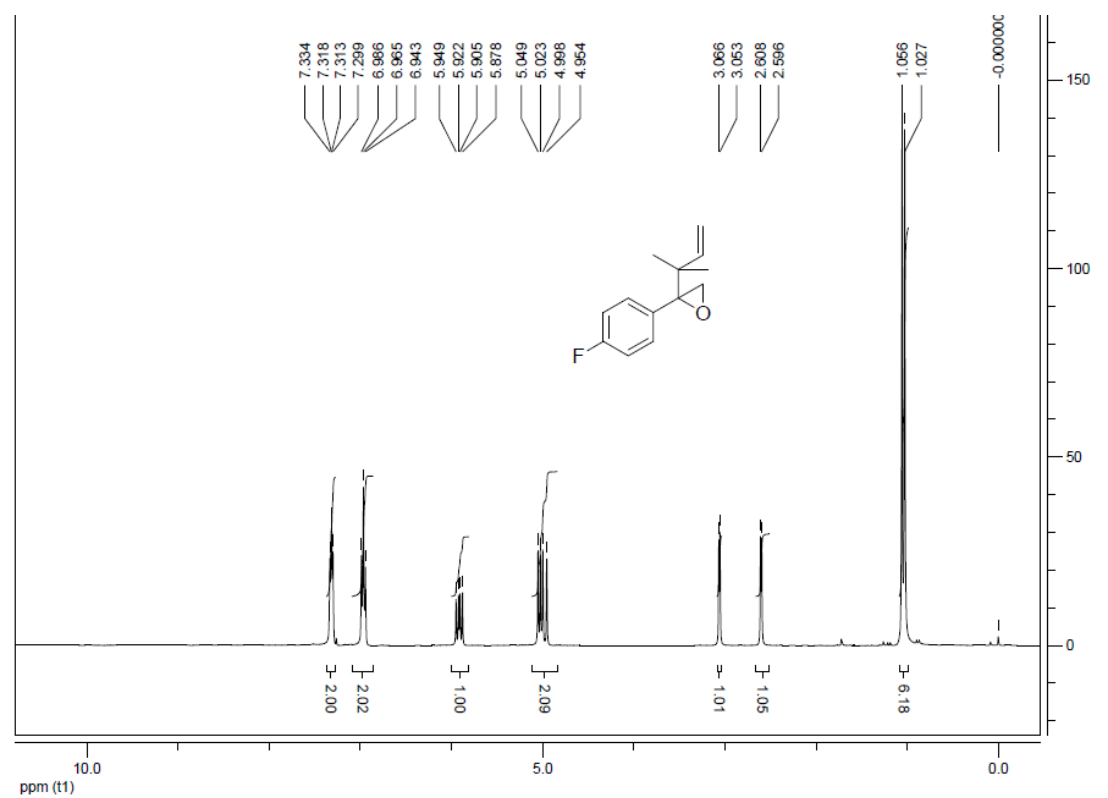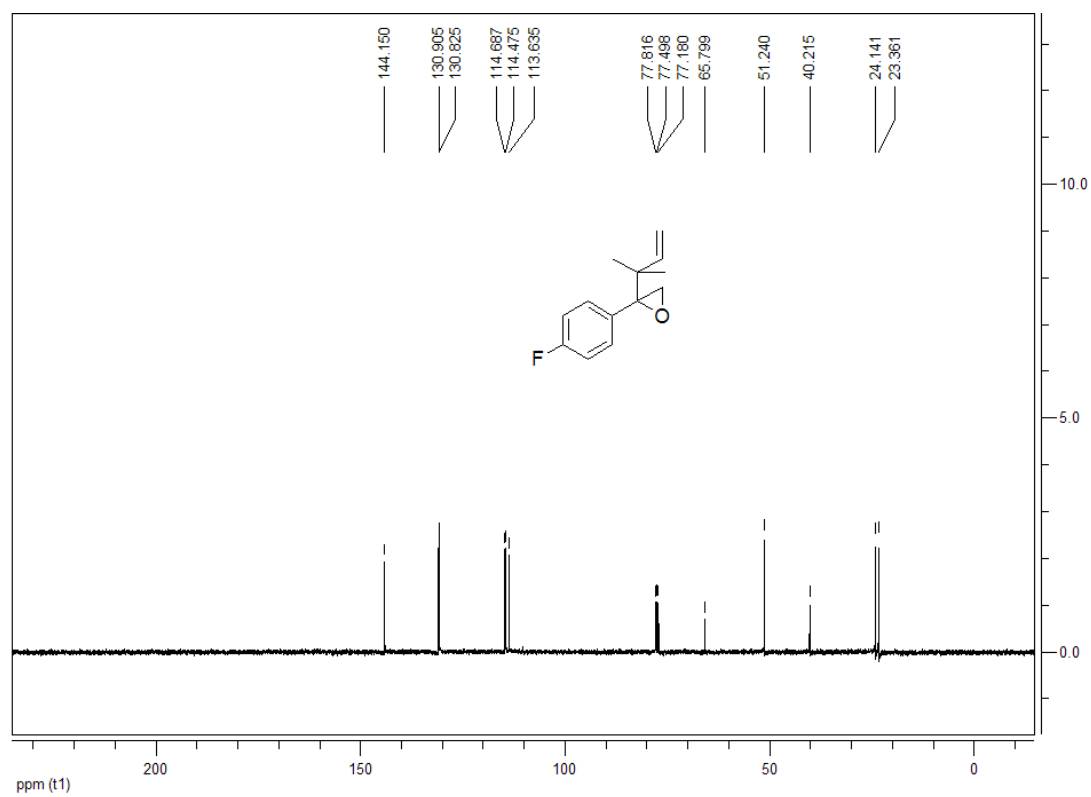

(4b)

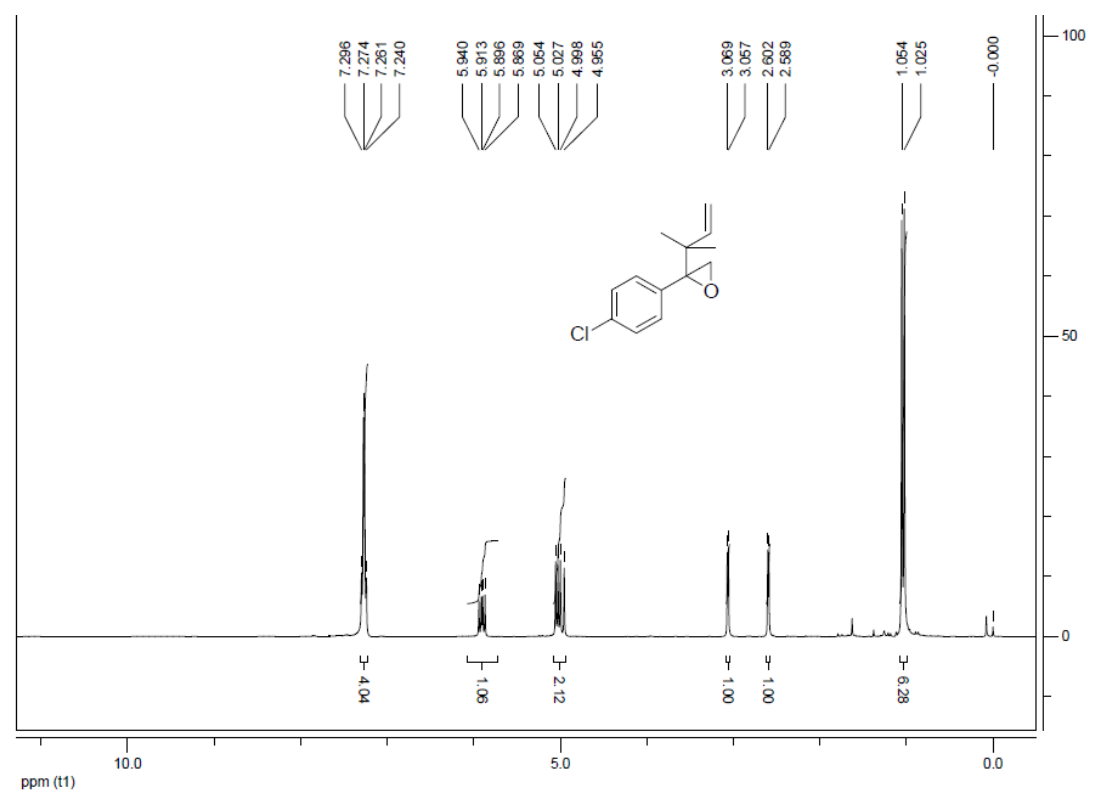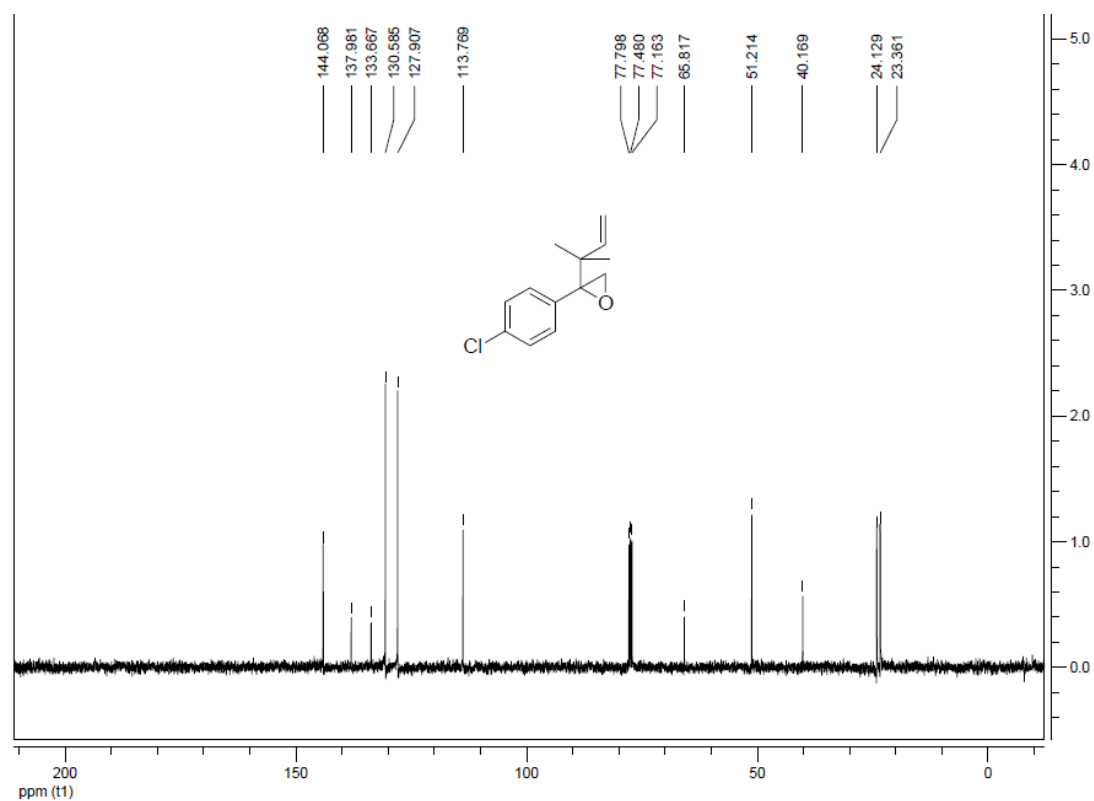

(4c)

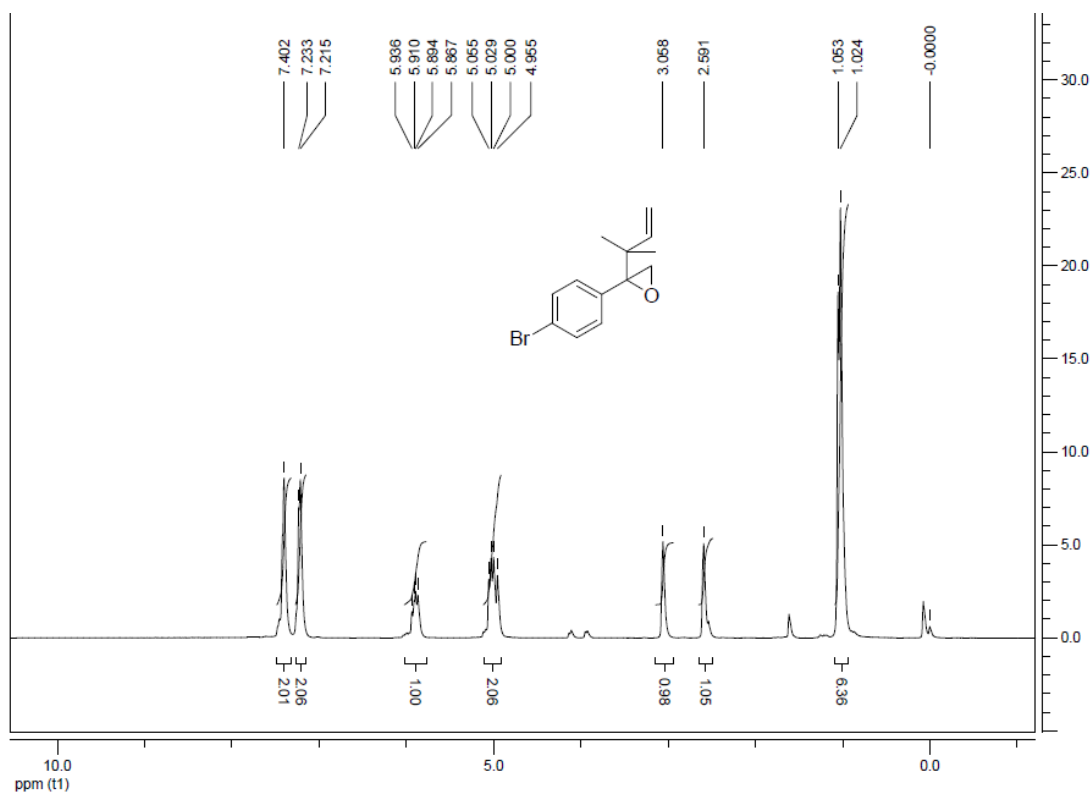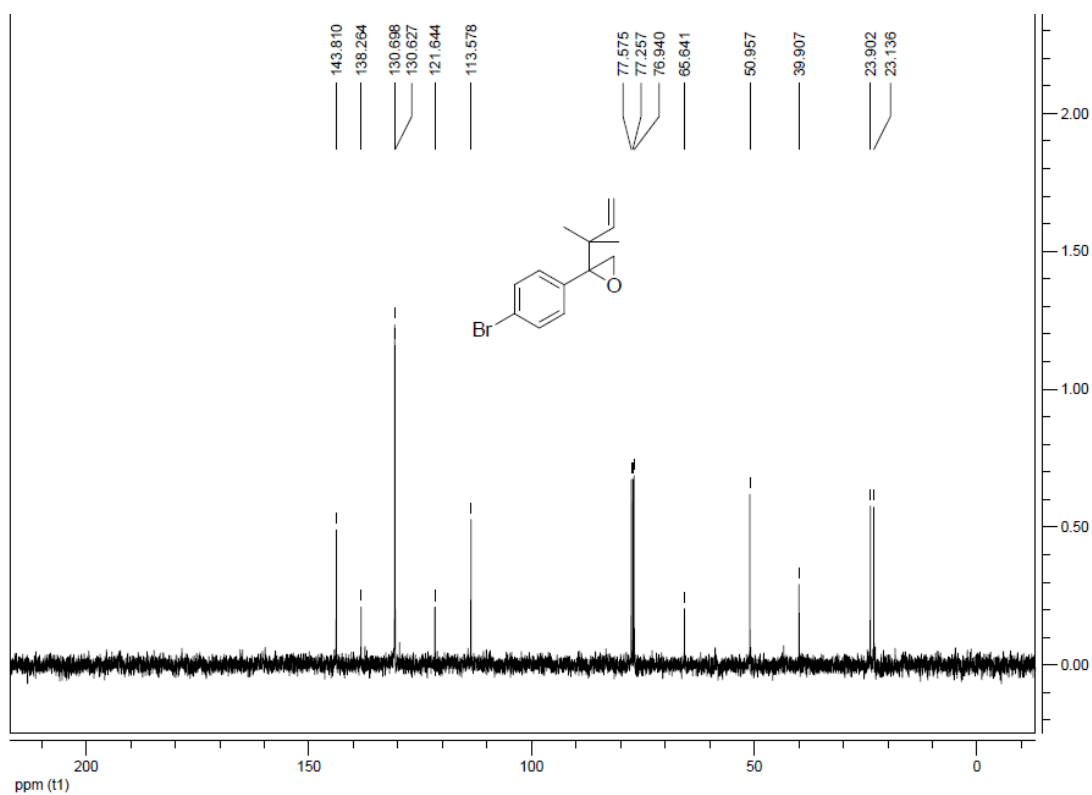

(4d)

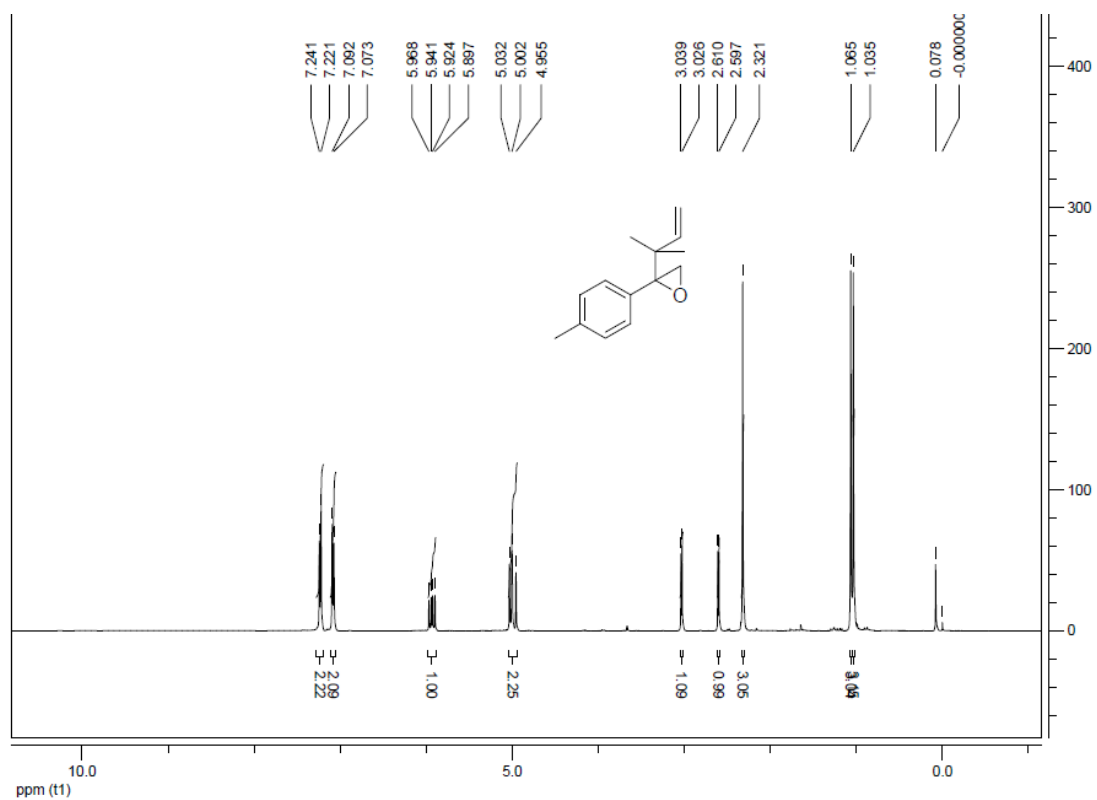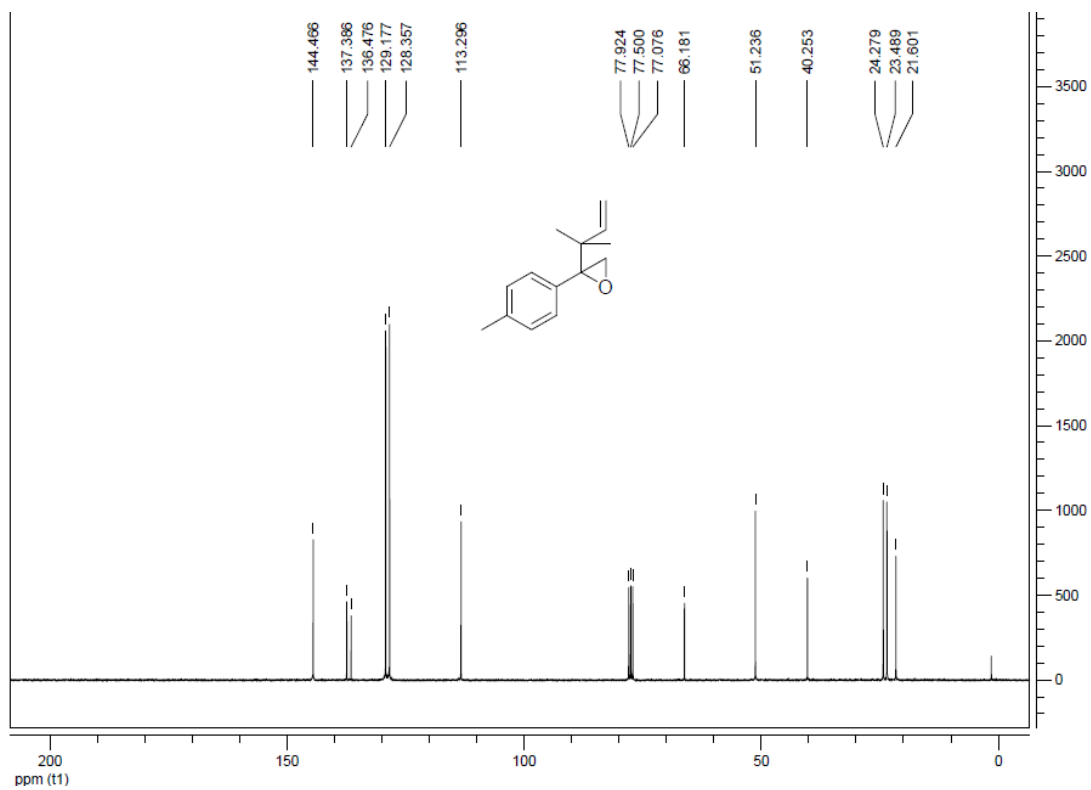

(4e)

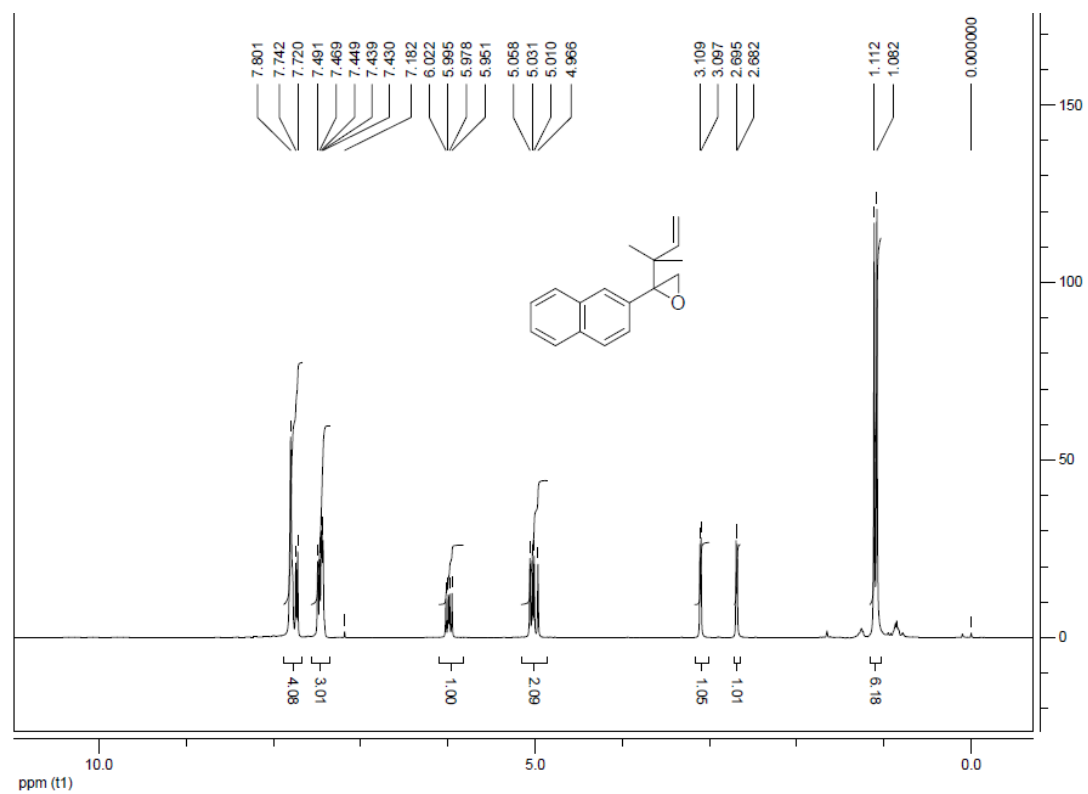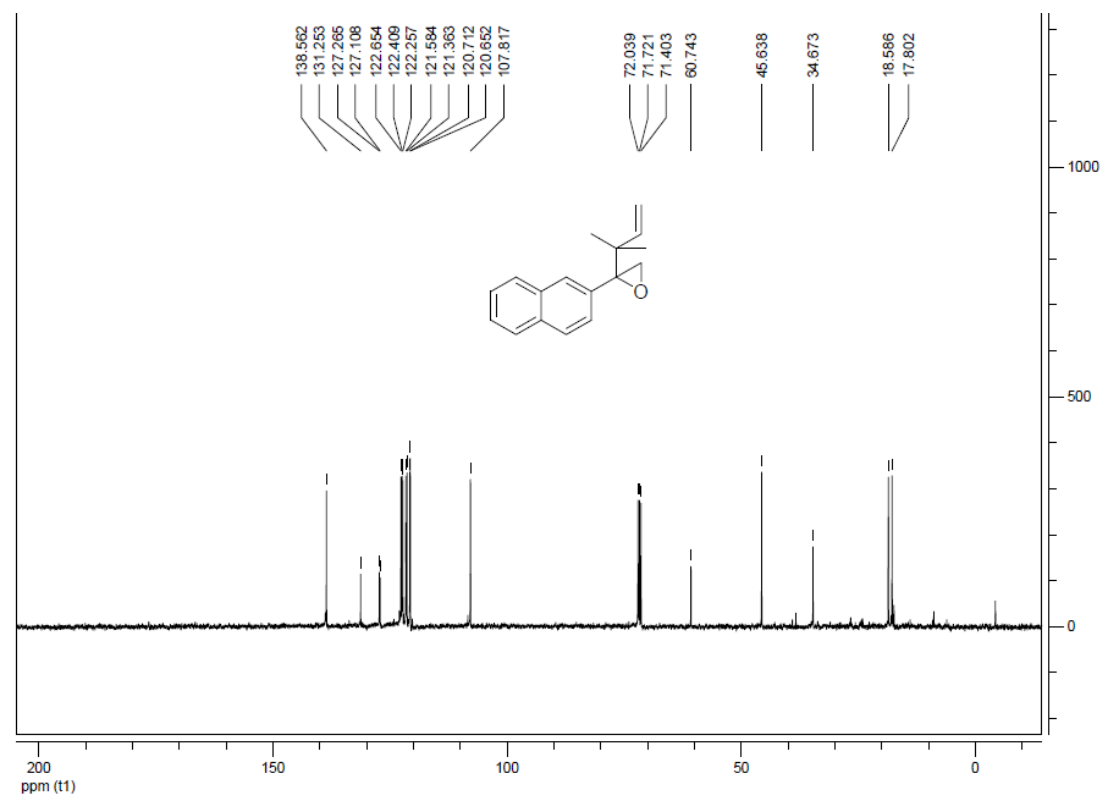

(4f)

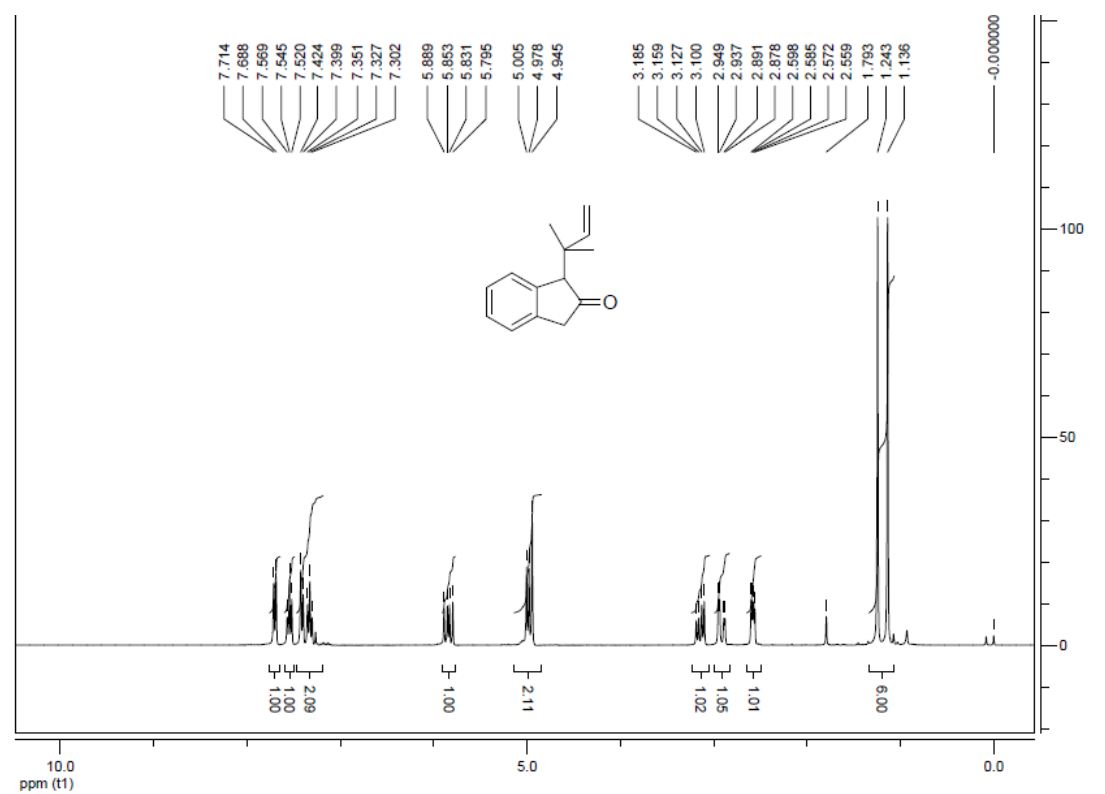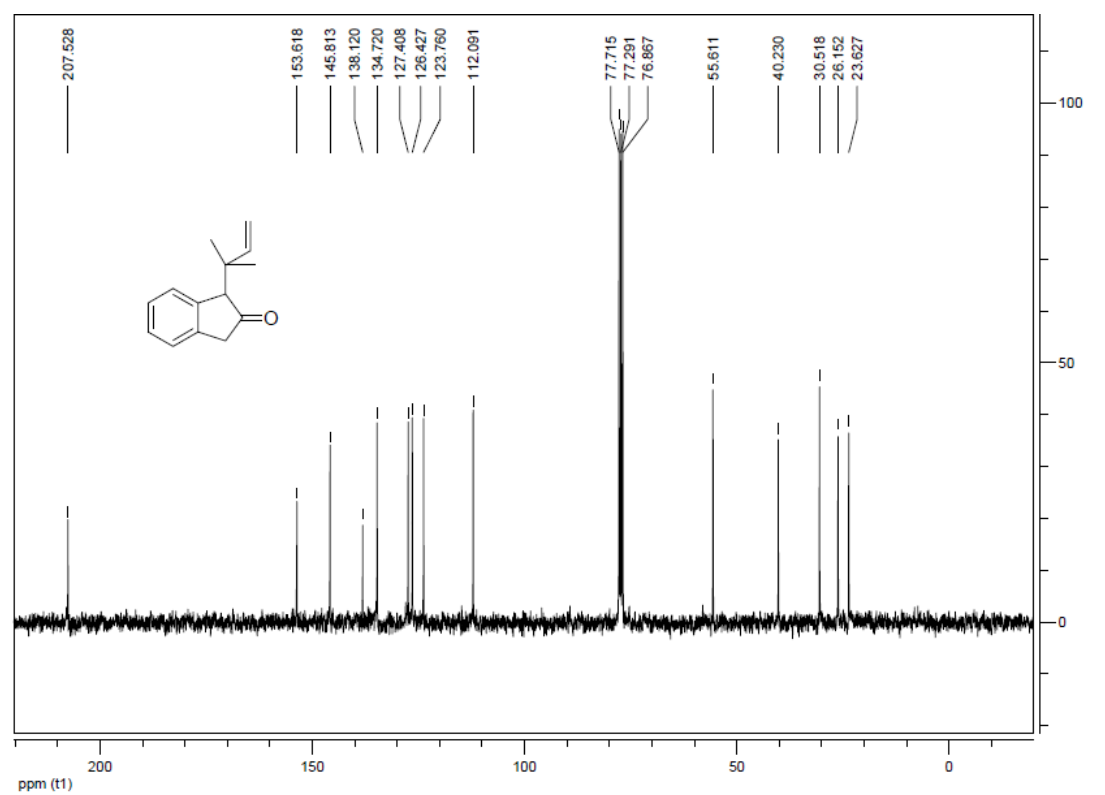



(4g)

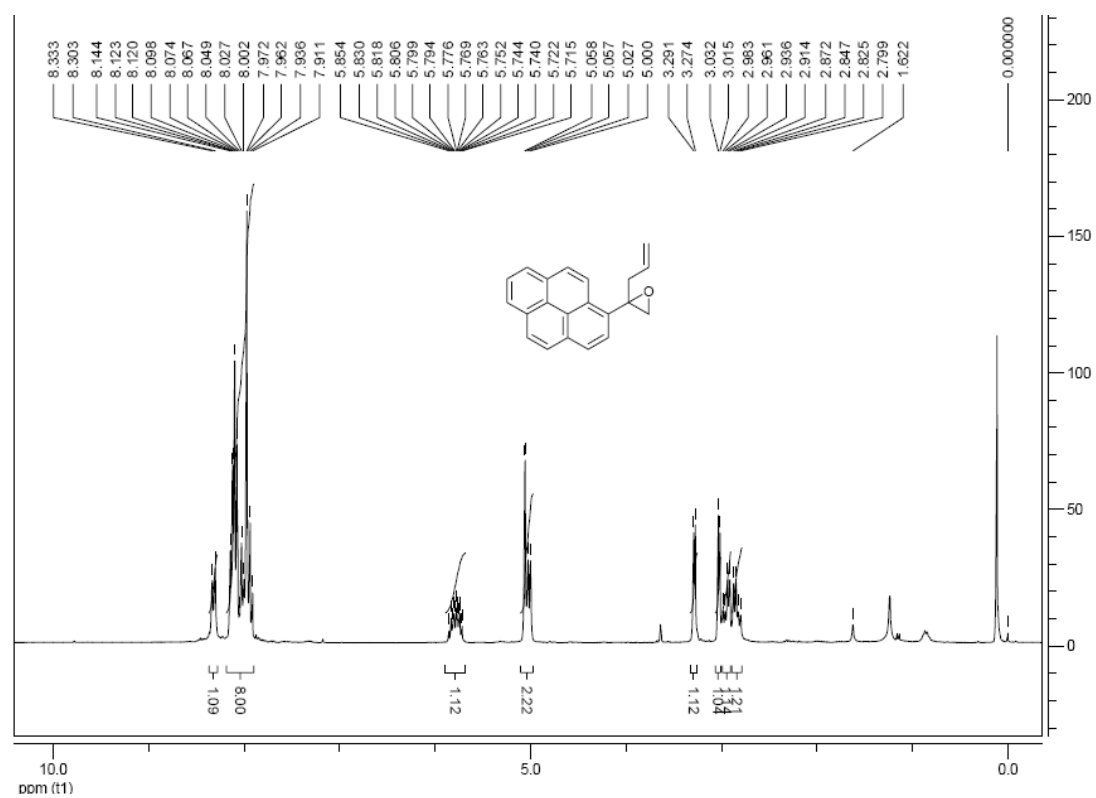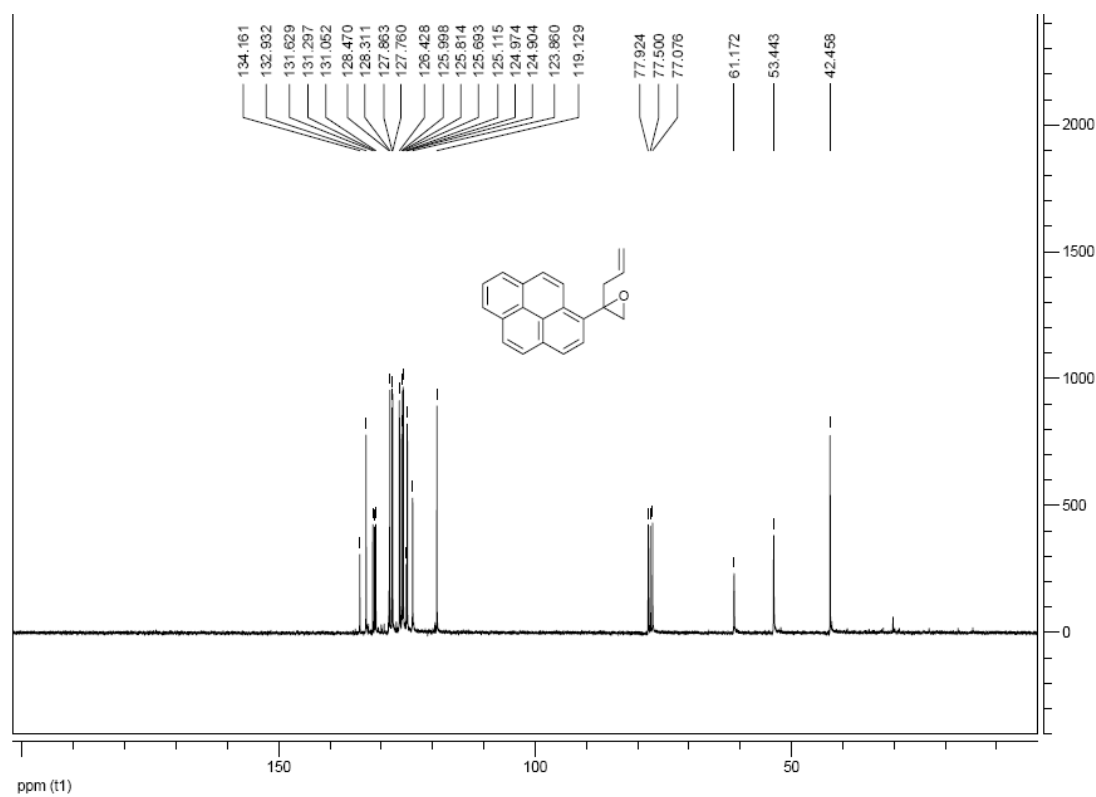

(3b)

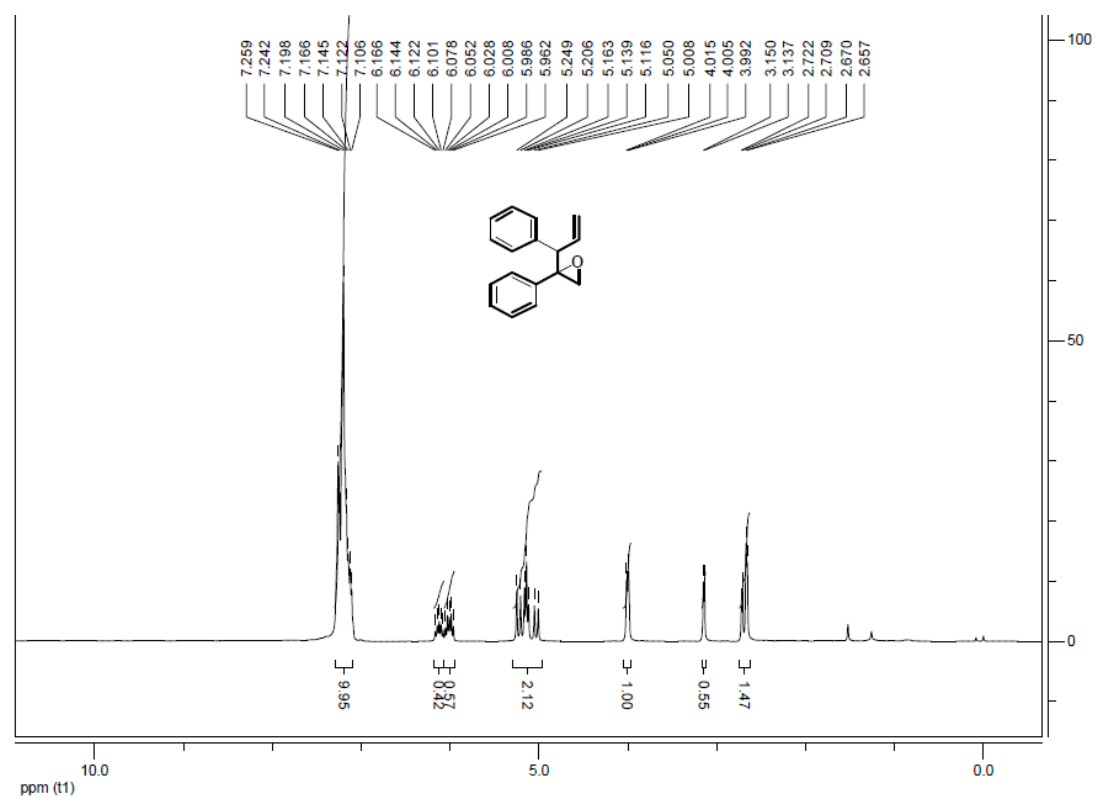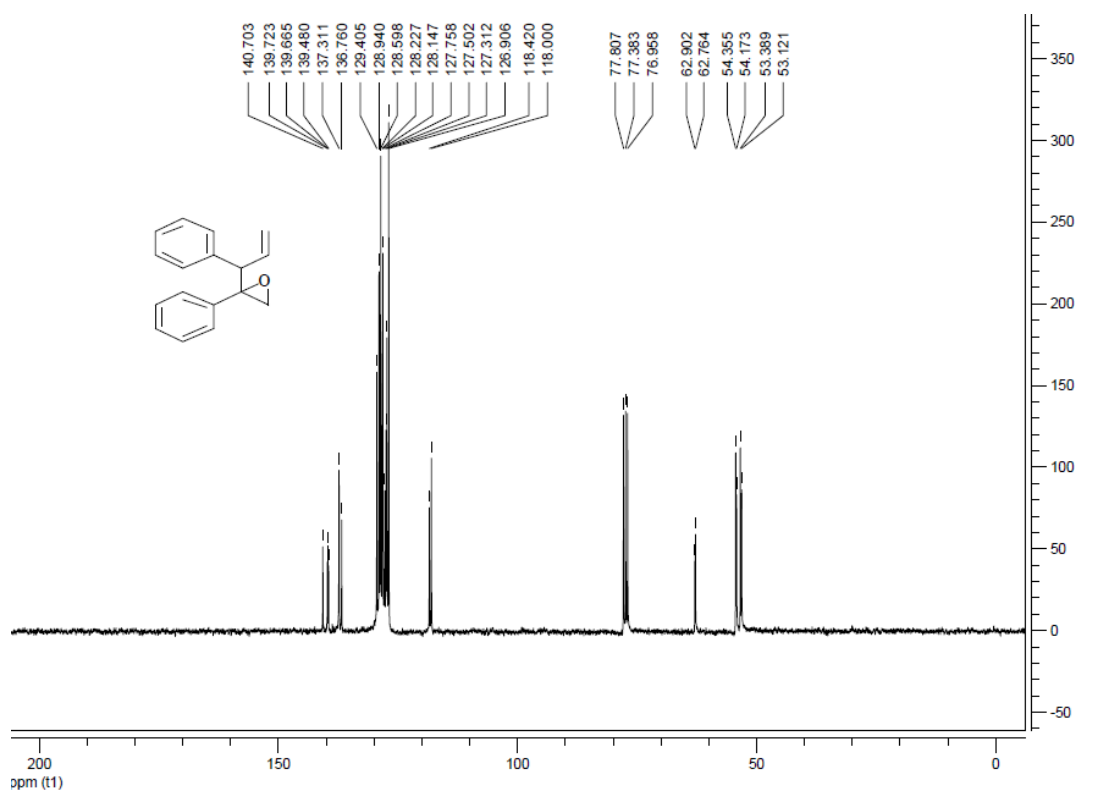

(4h)

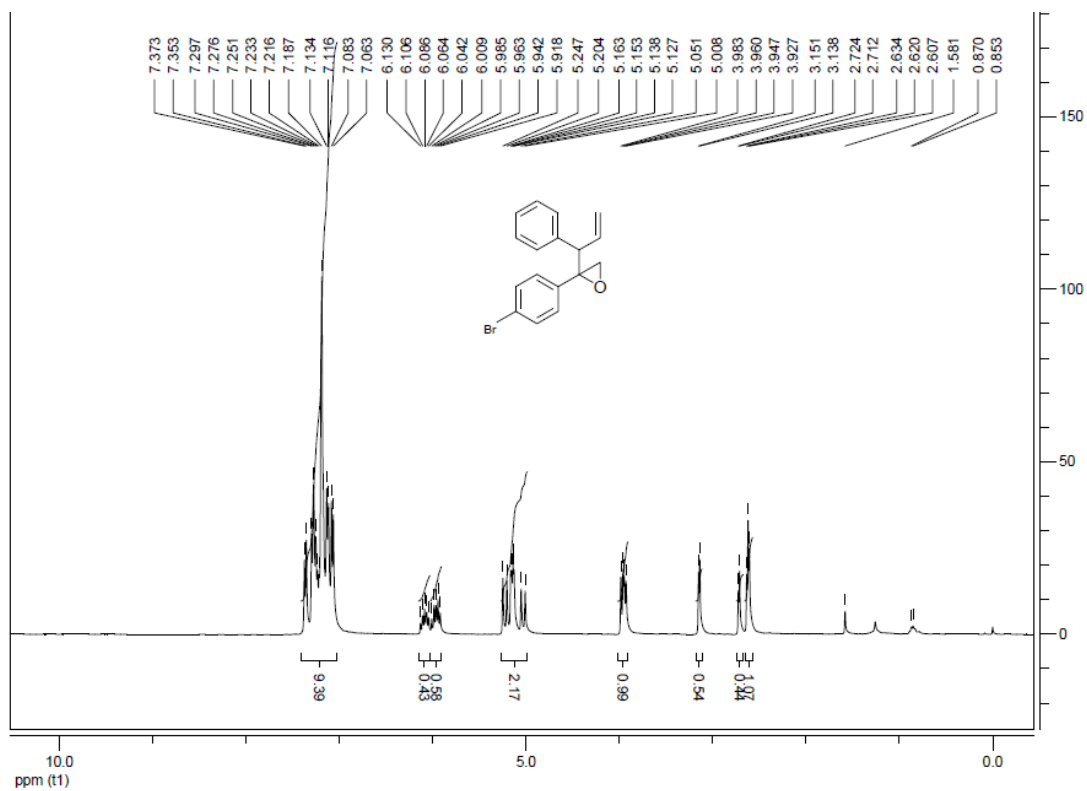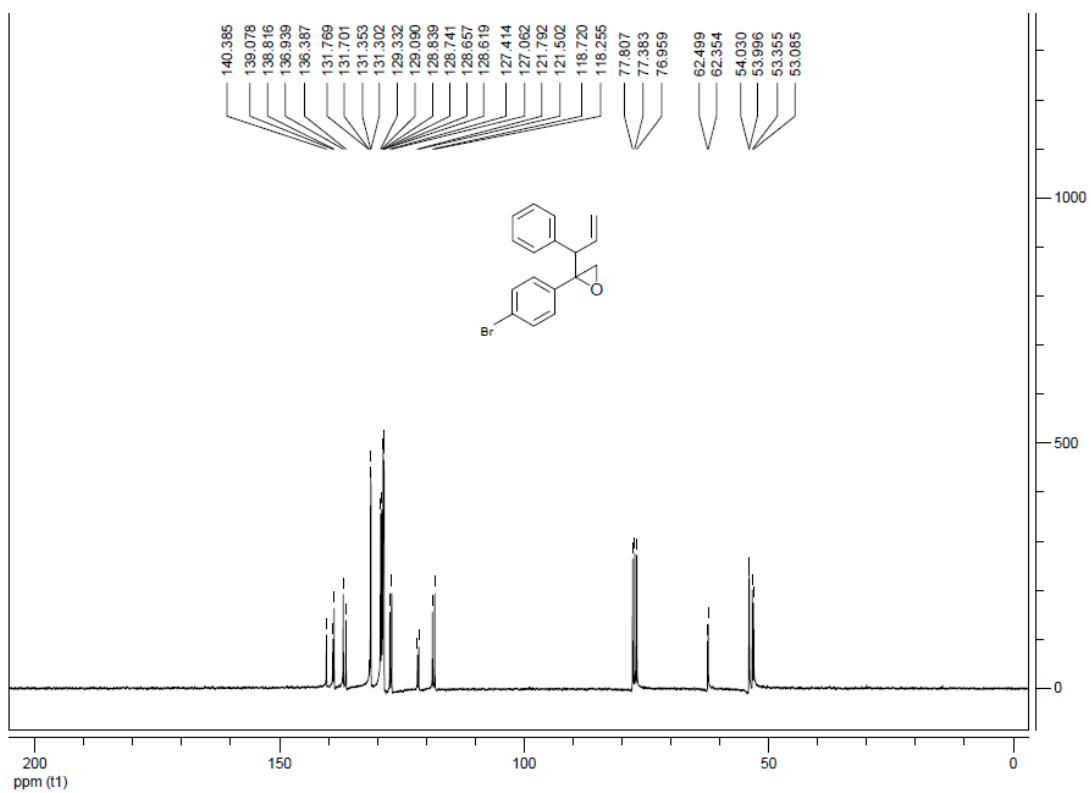

(4i)

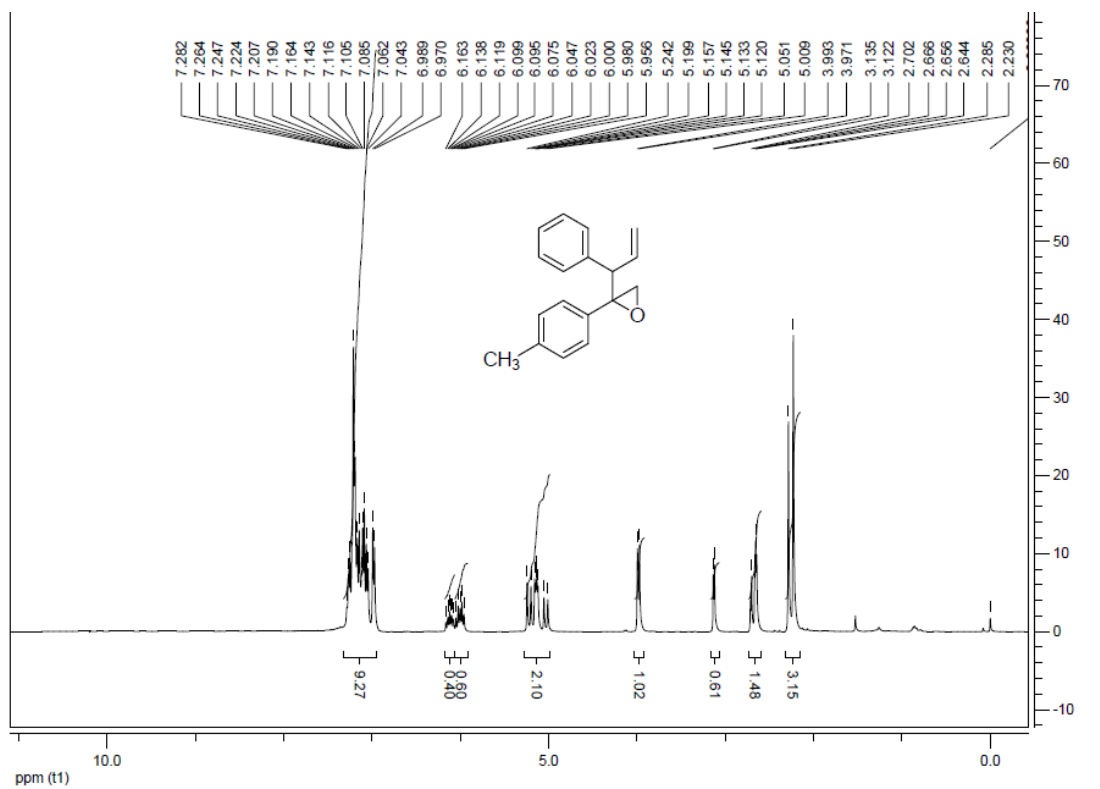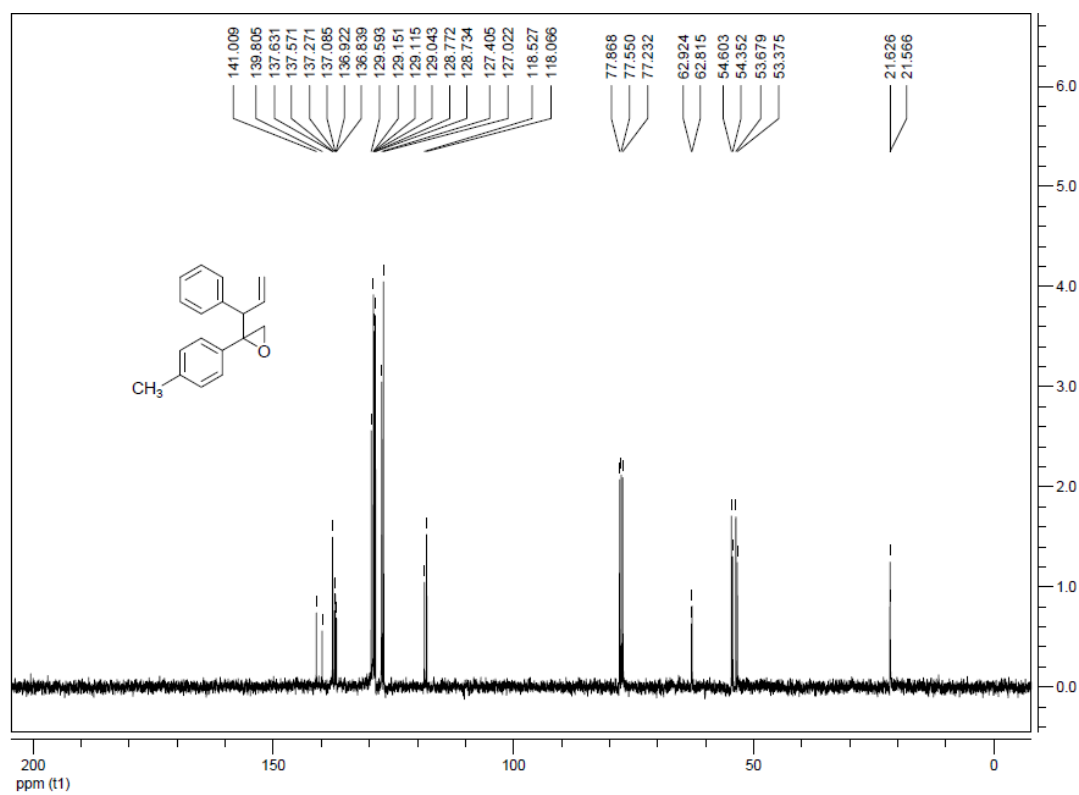

(3c)

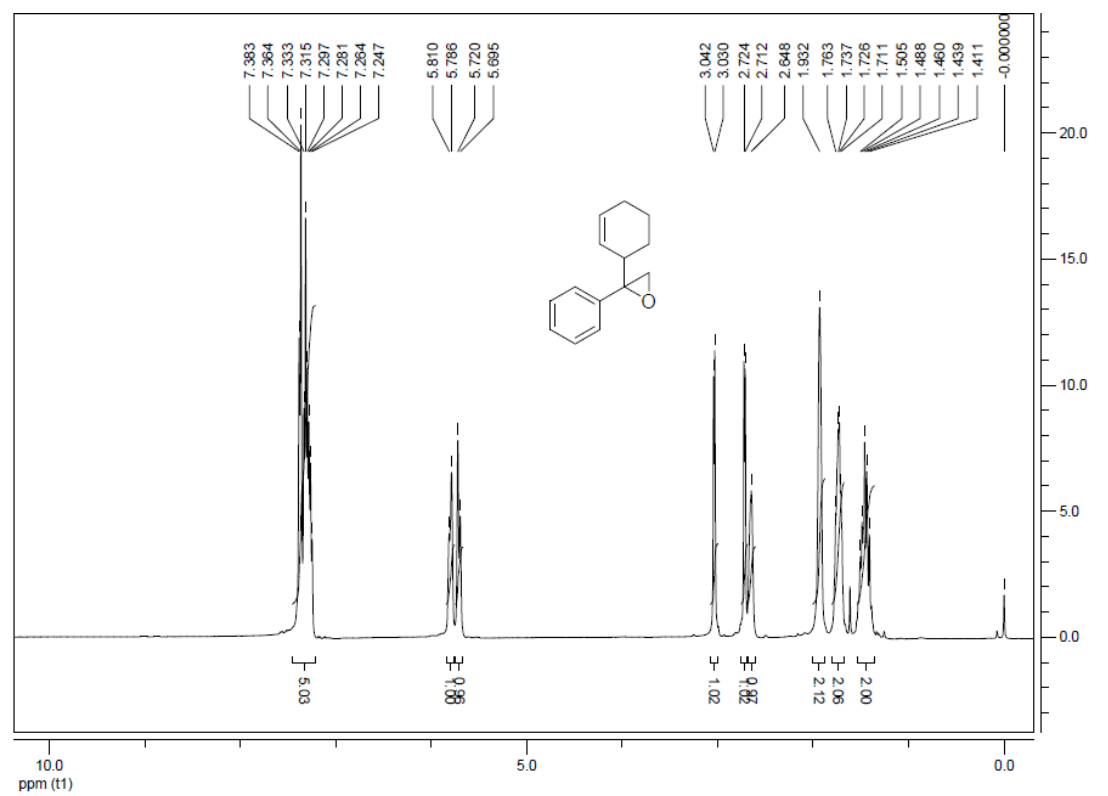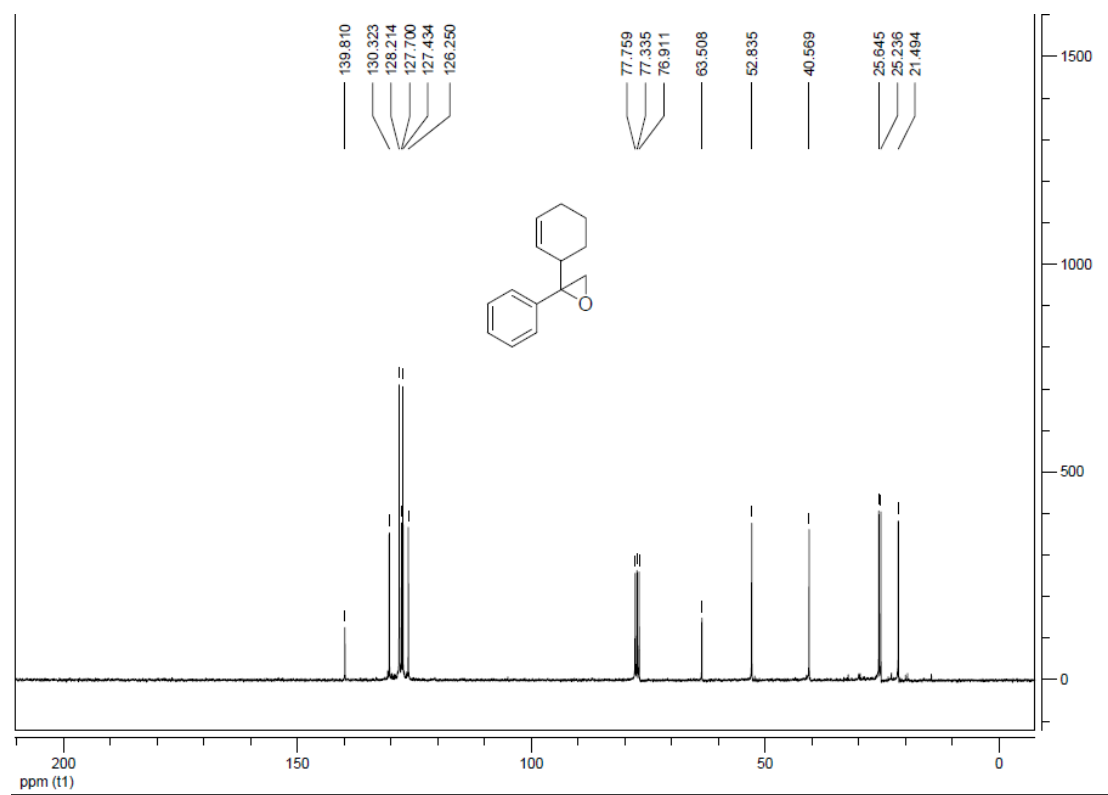

(5ca)

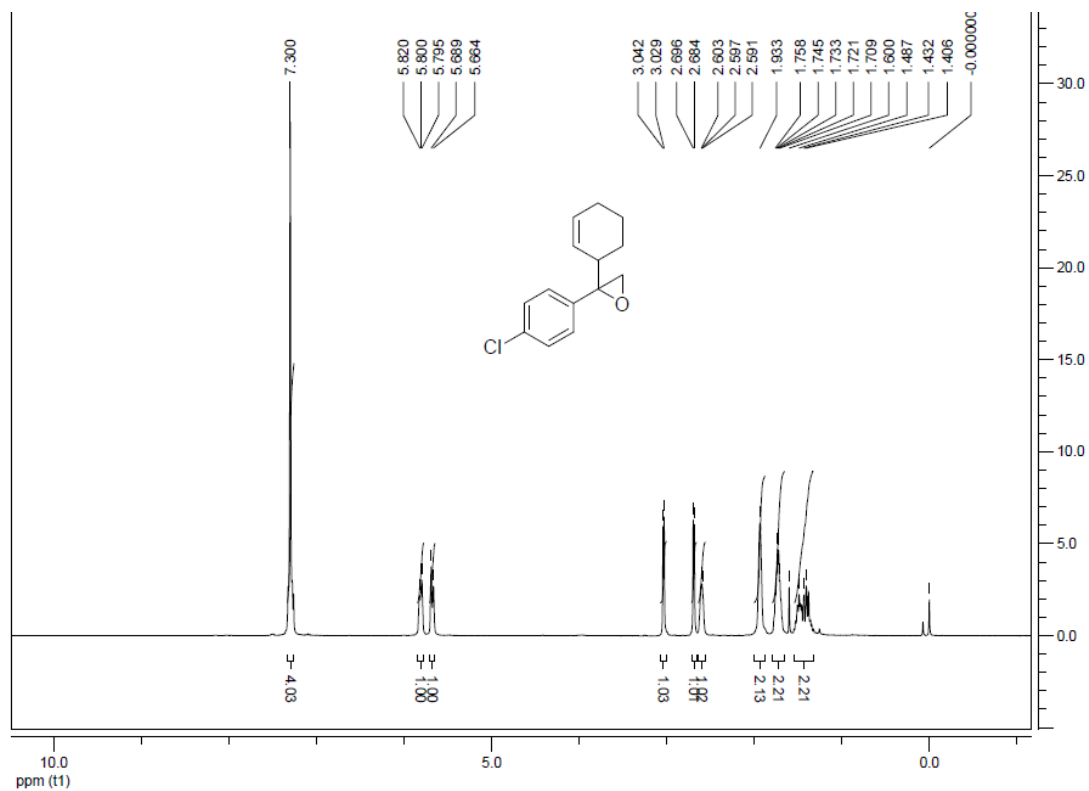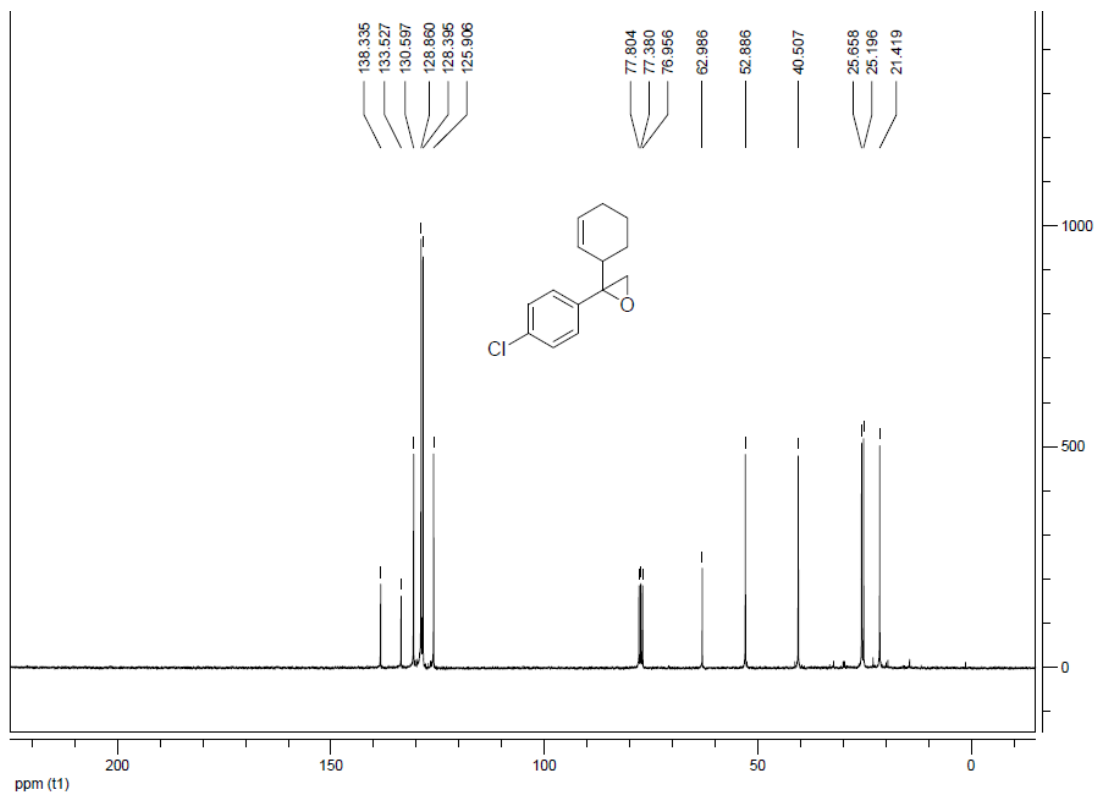

(5cb)

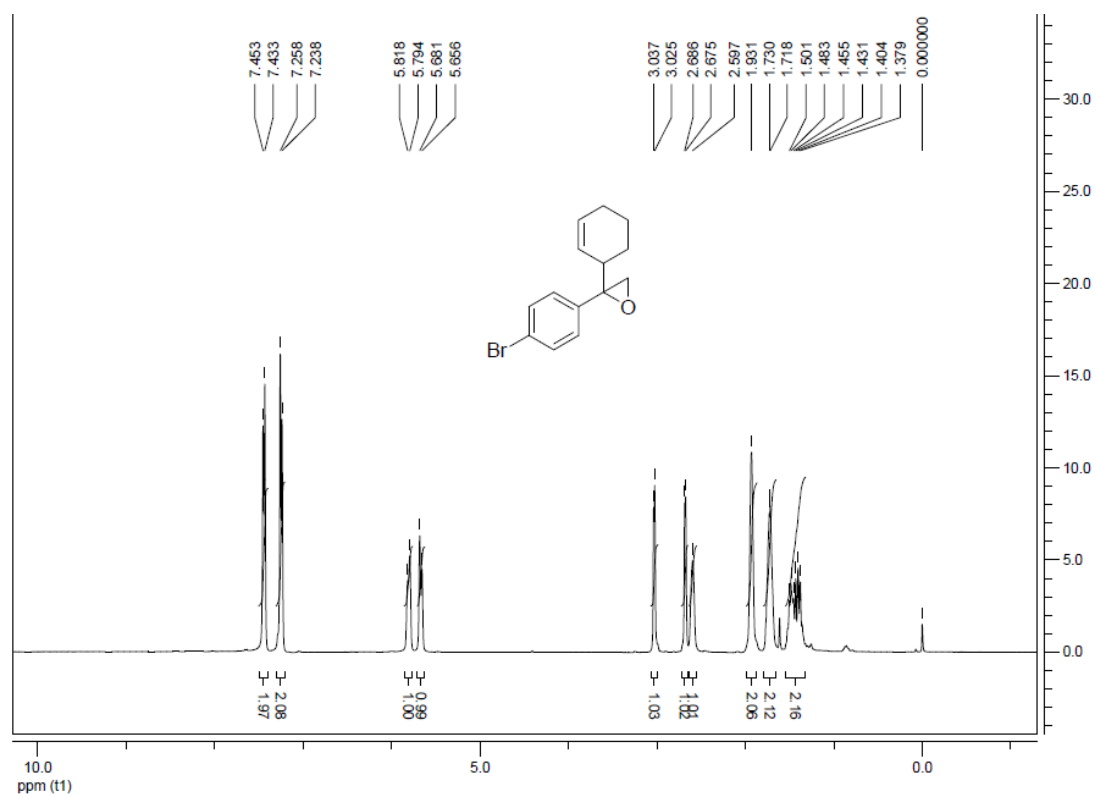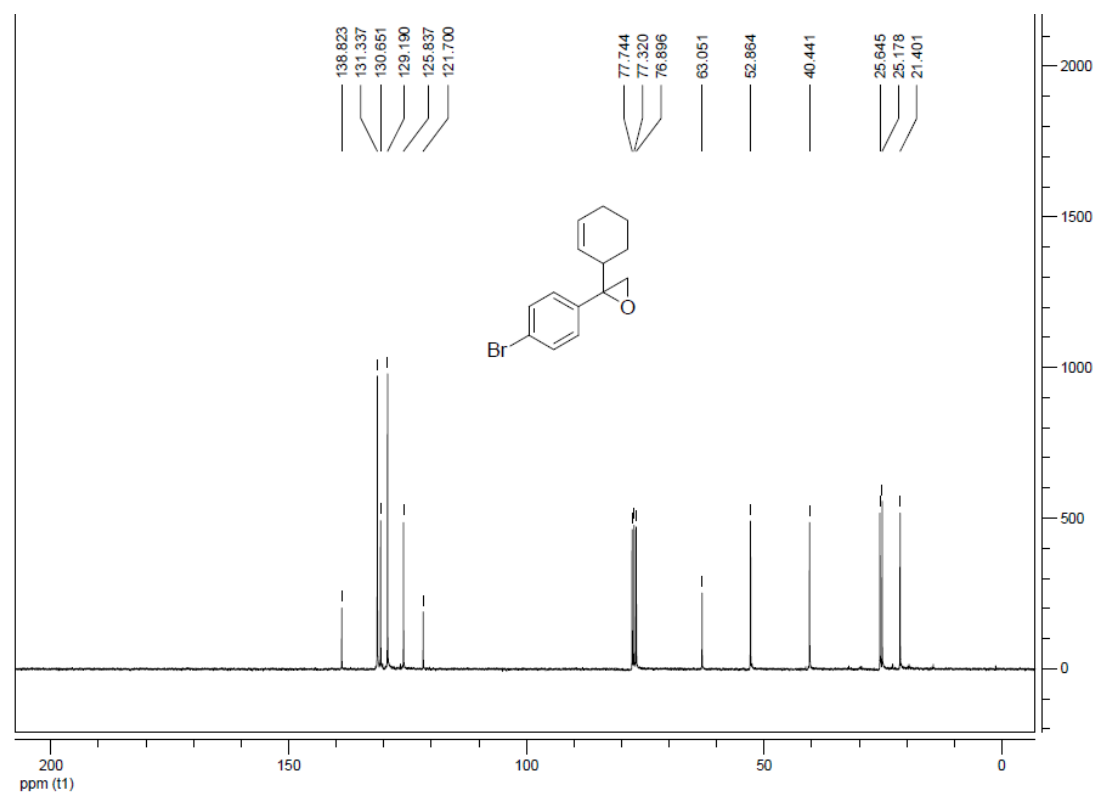

(5cc)

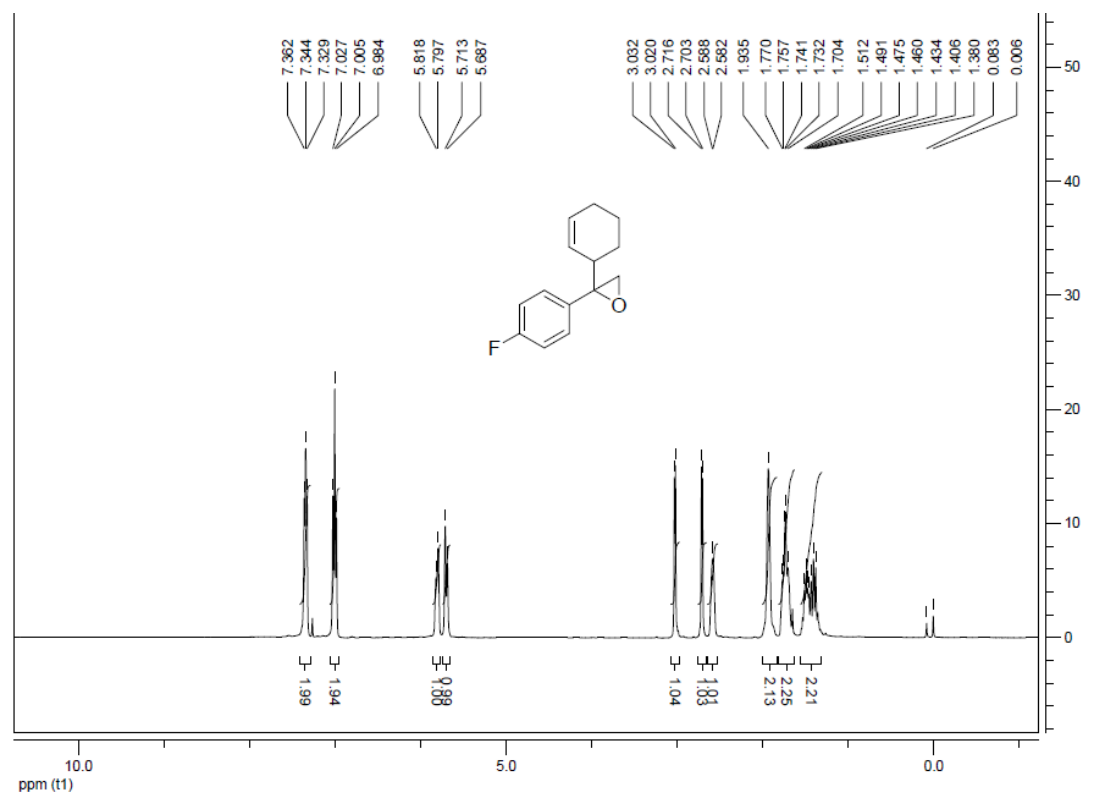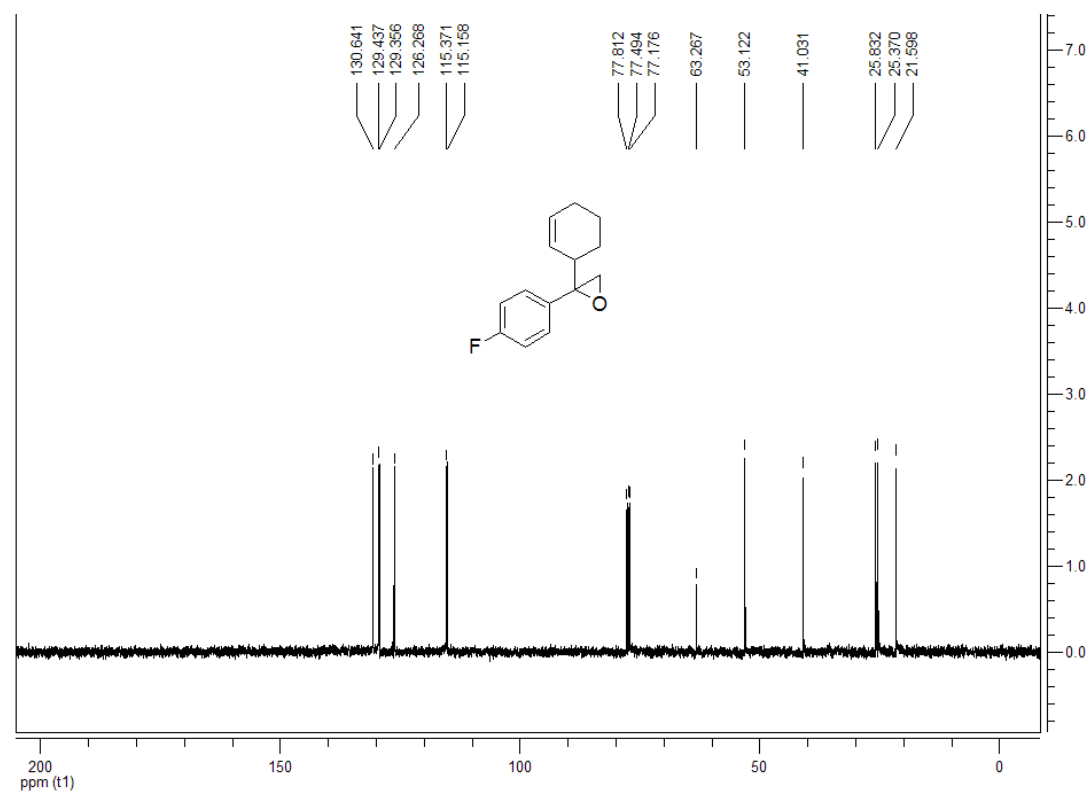



(5cd)

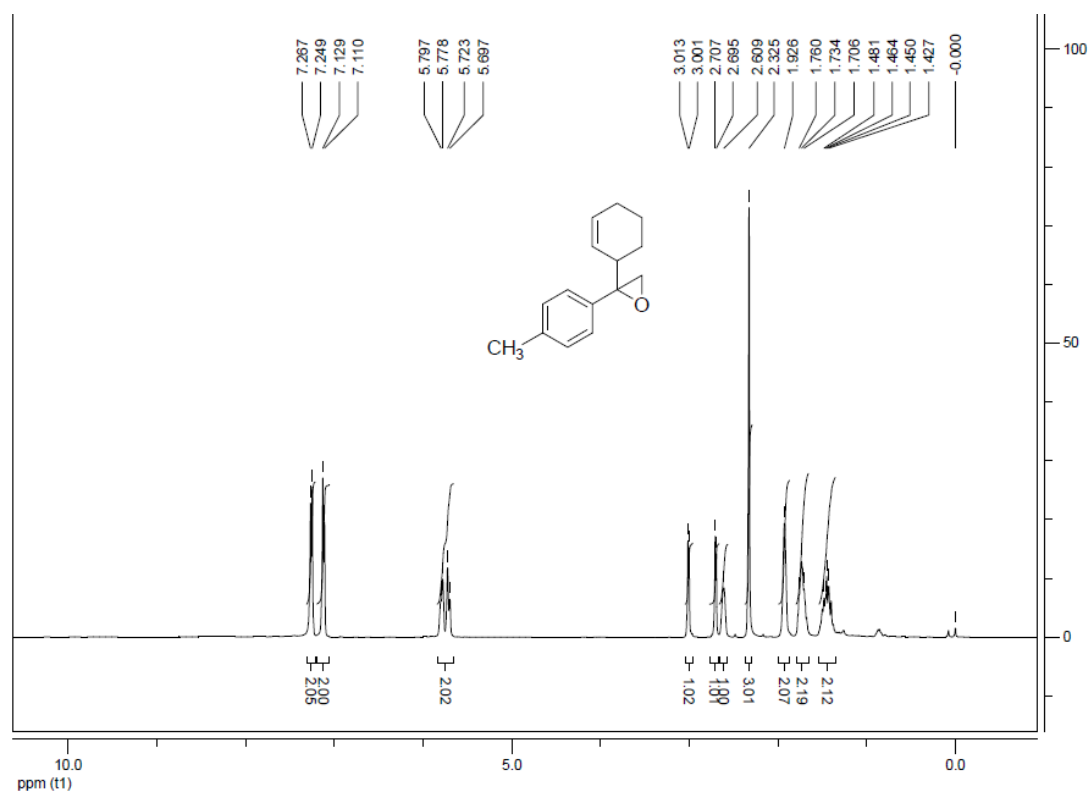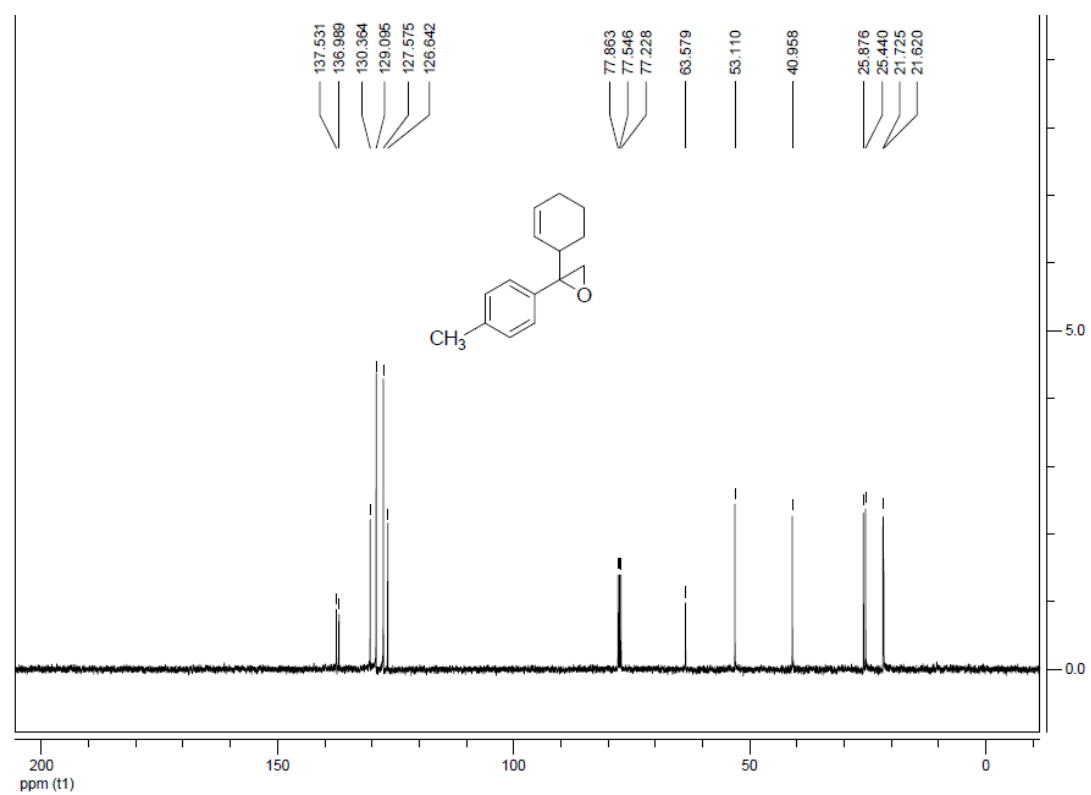

(5ce)

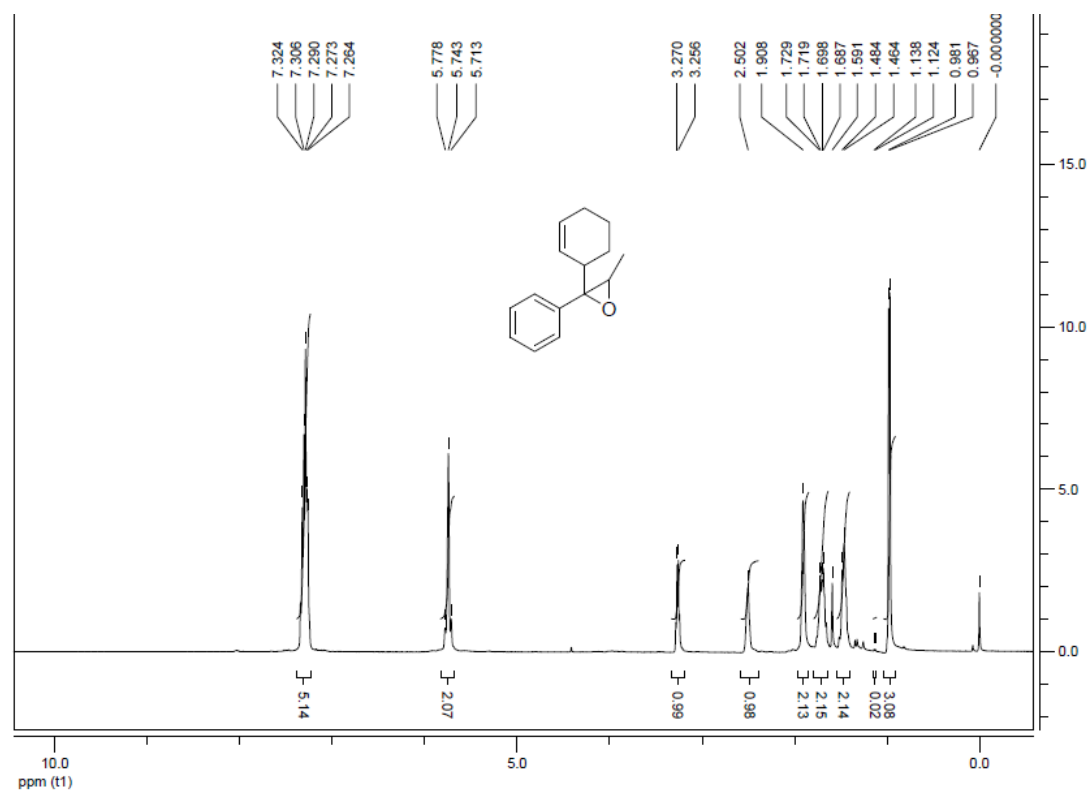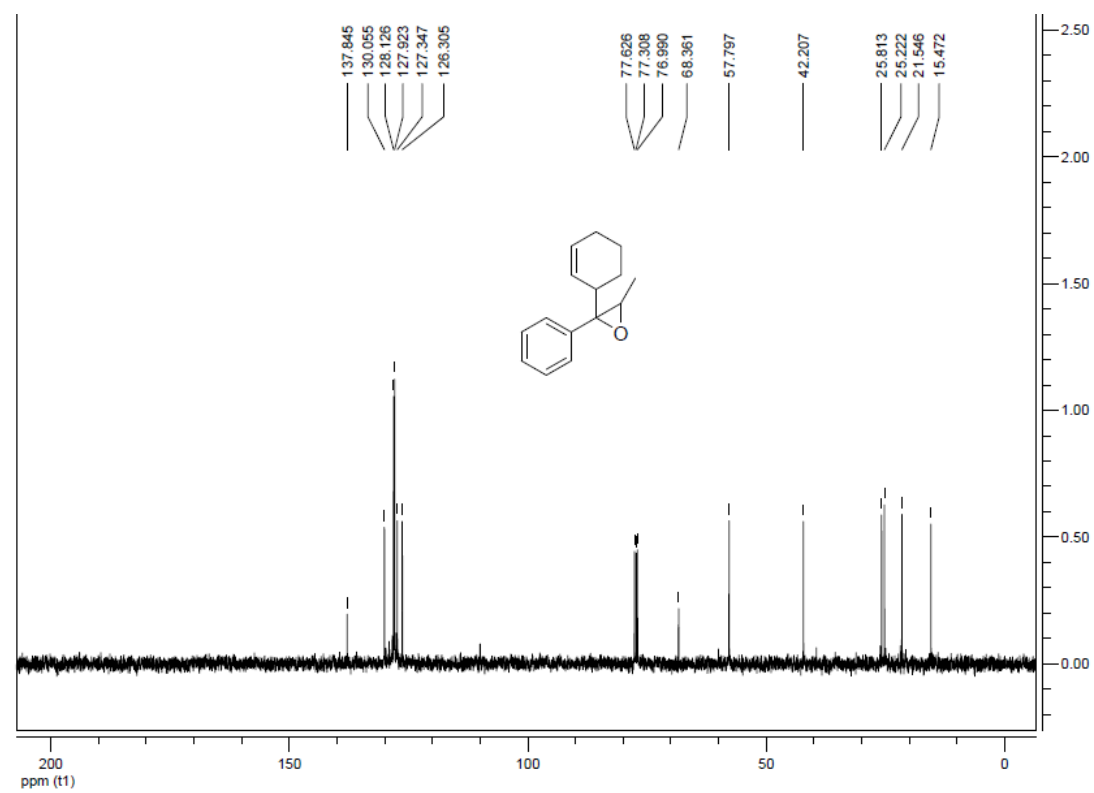

(5cf)

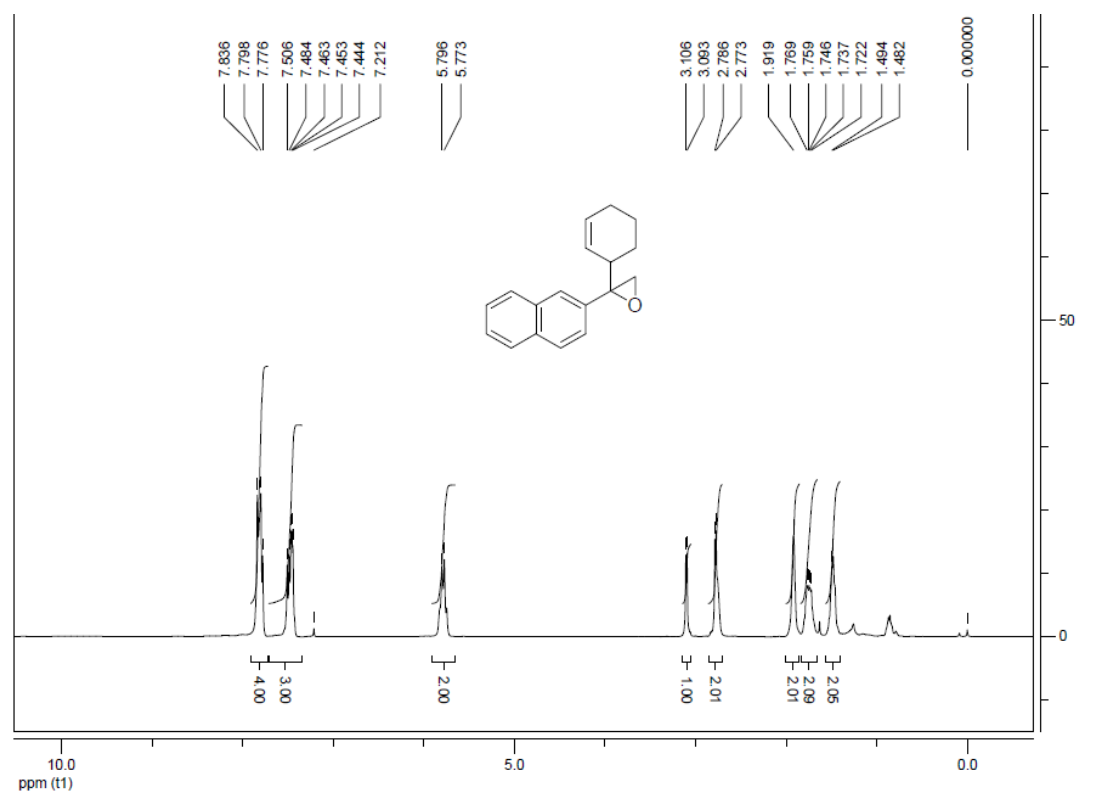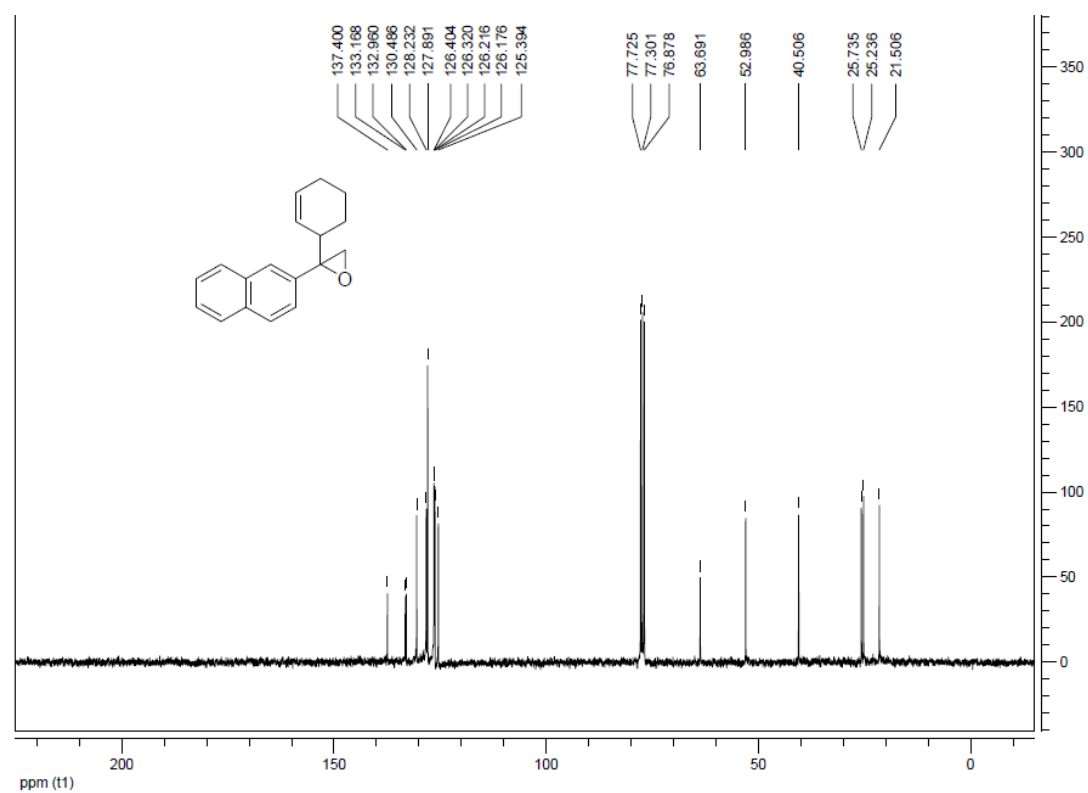



(5da)

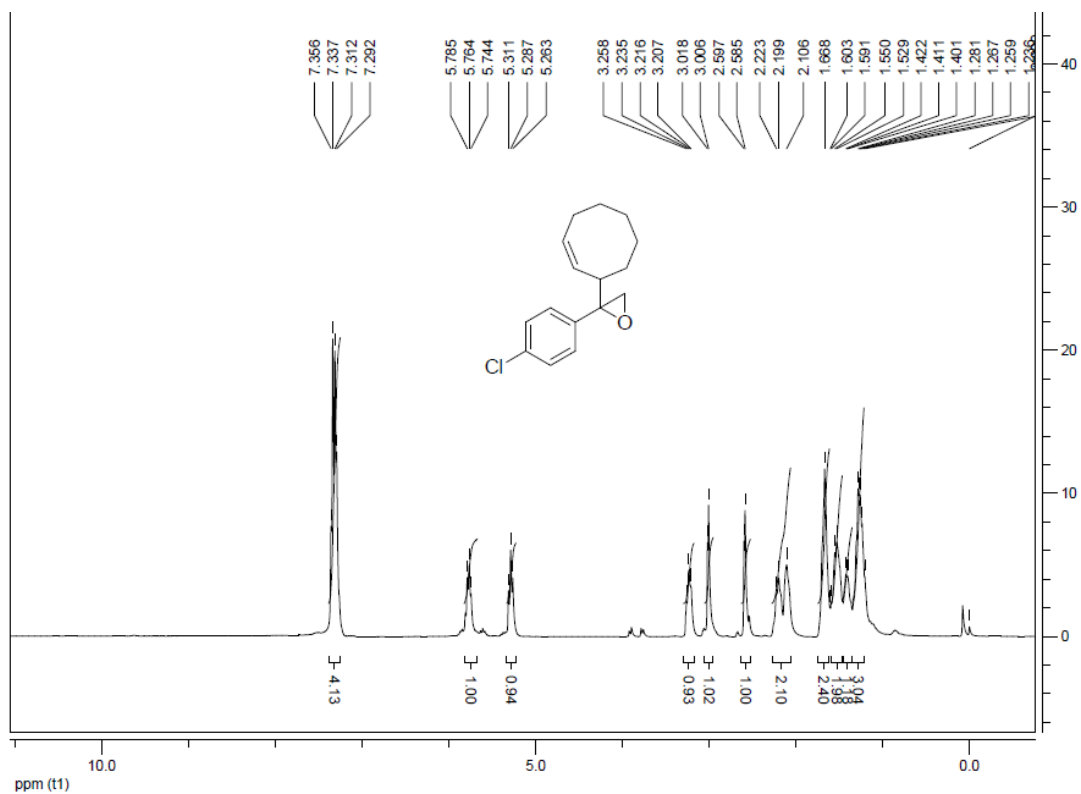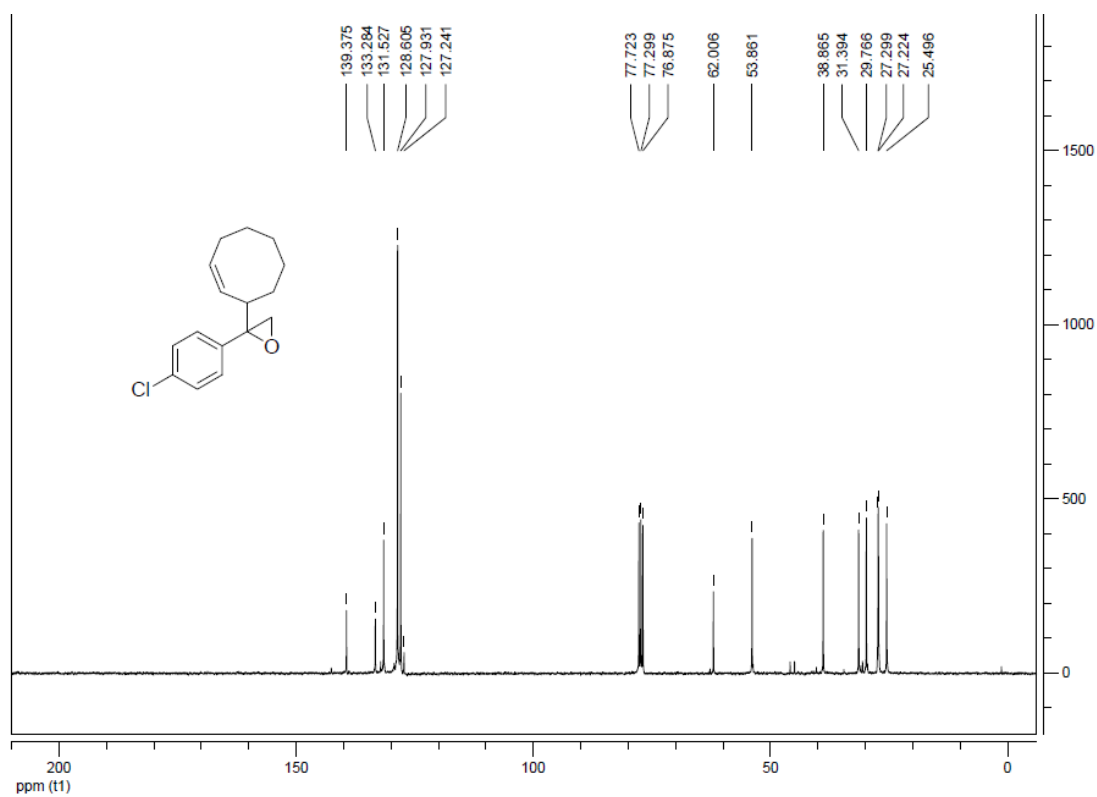

(5db)

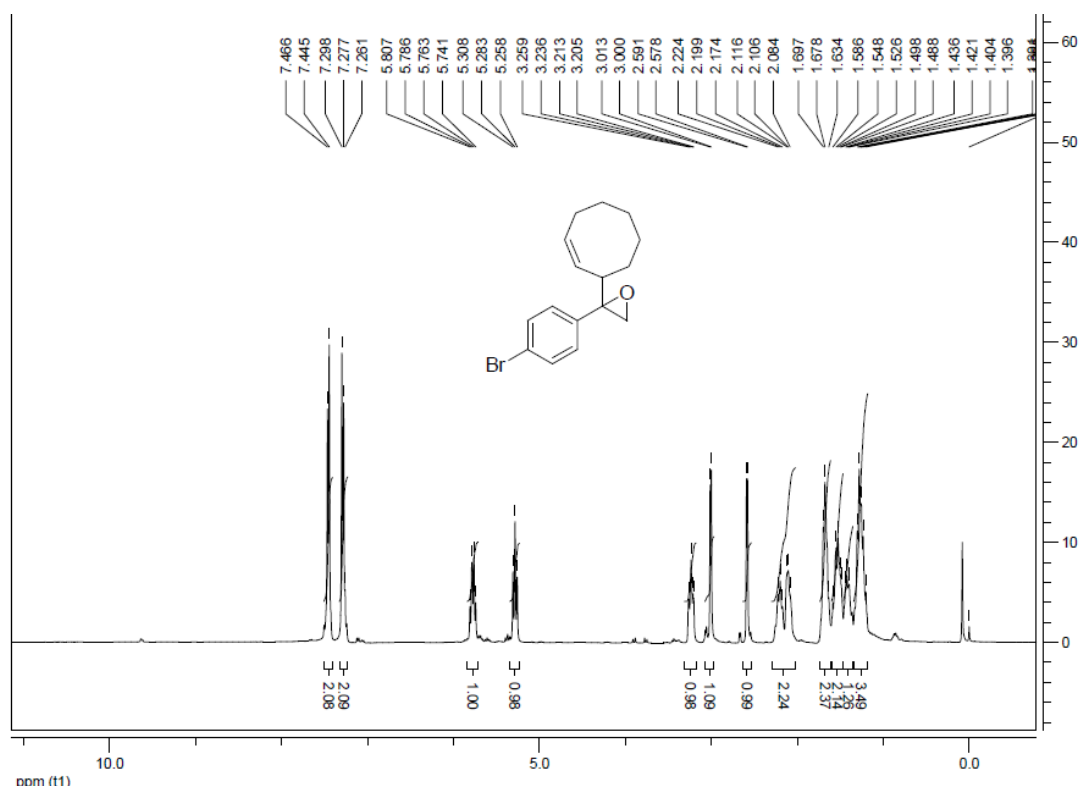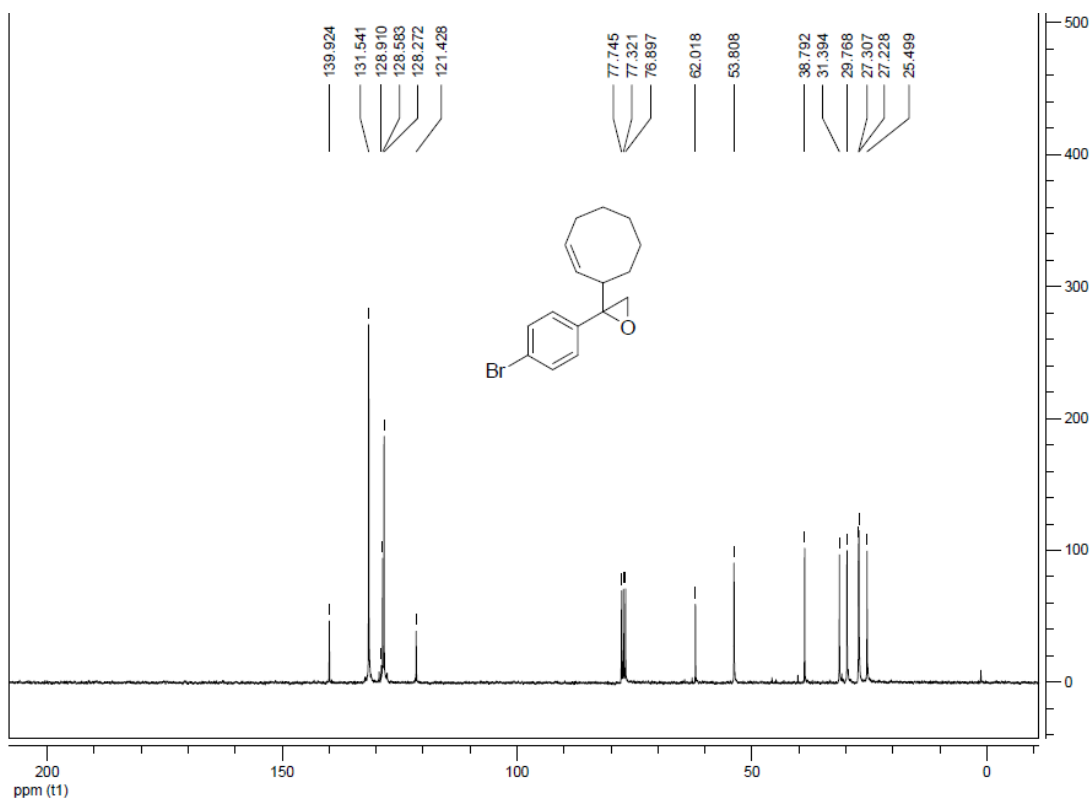

(5dc)

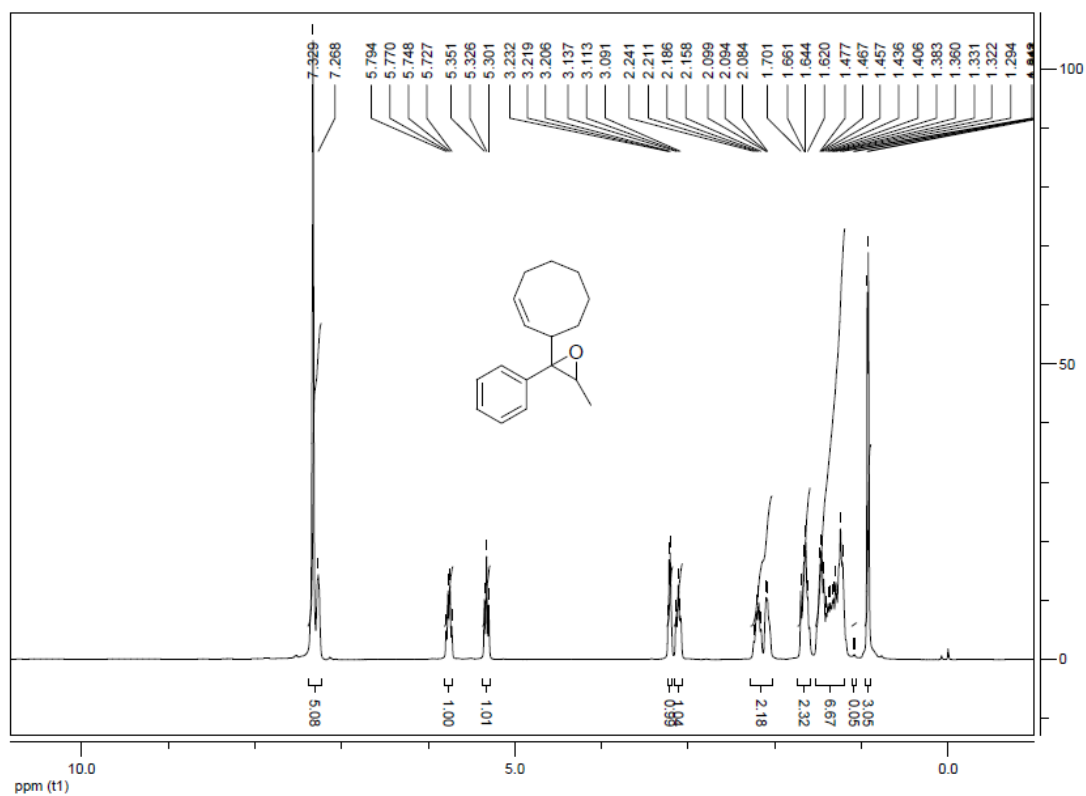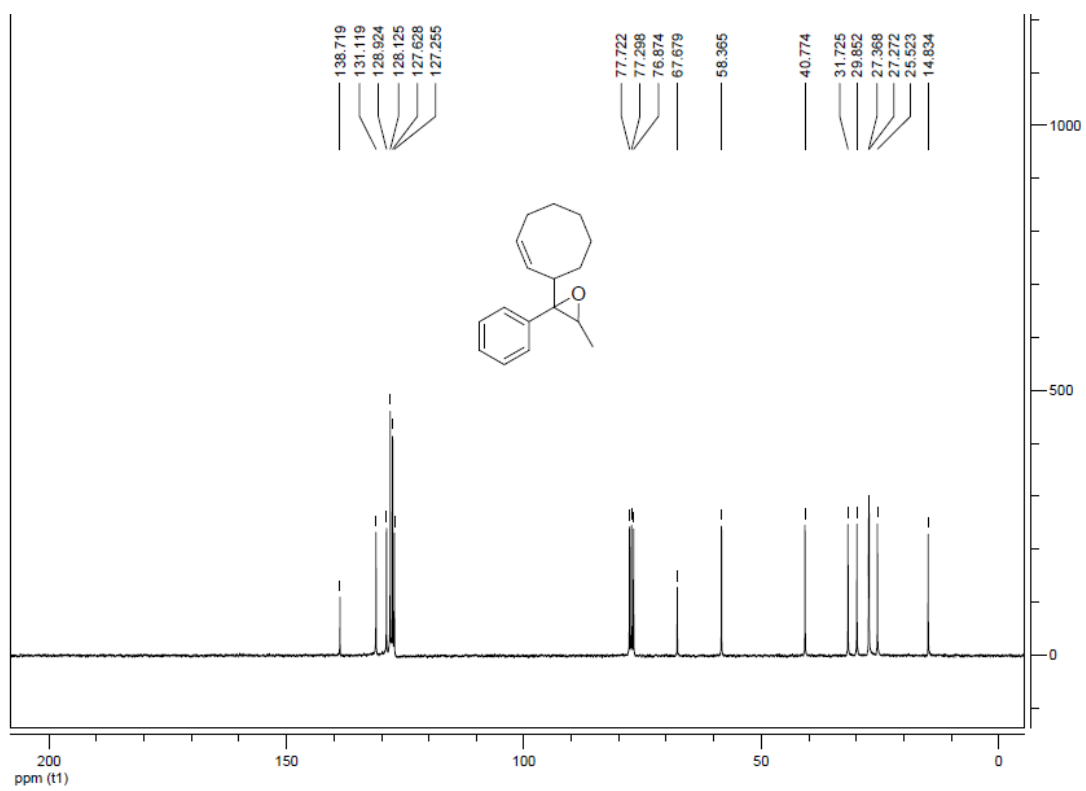

(5dd)

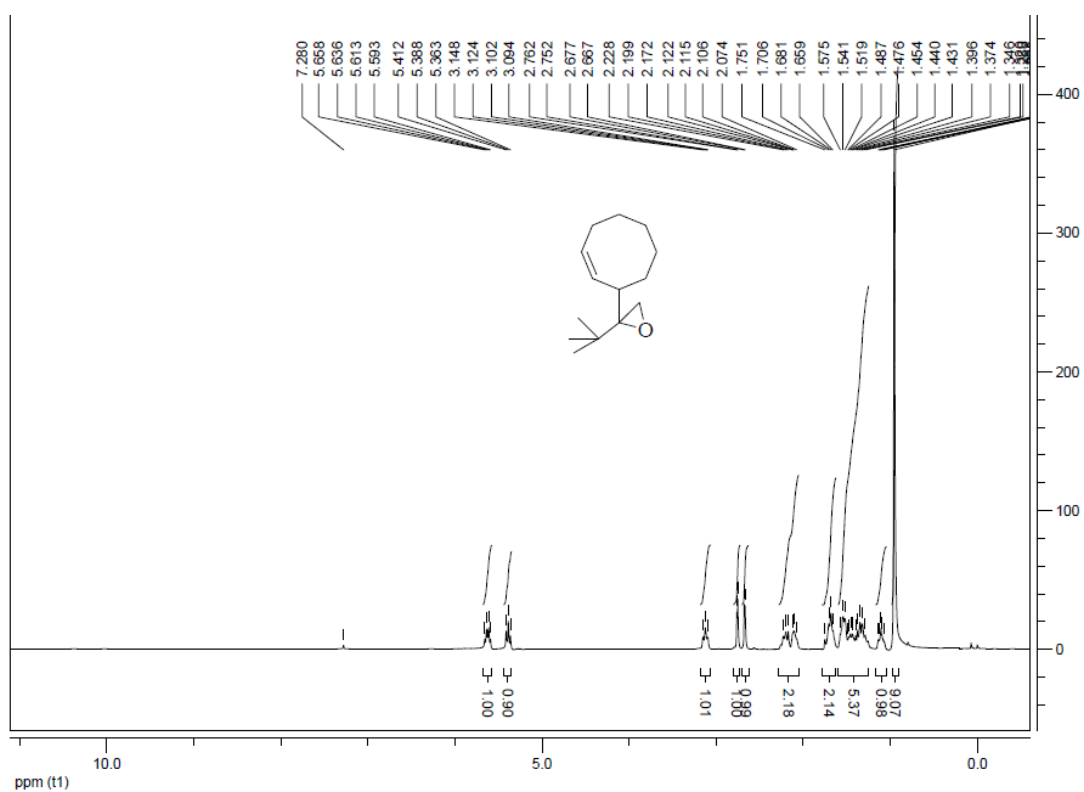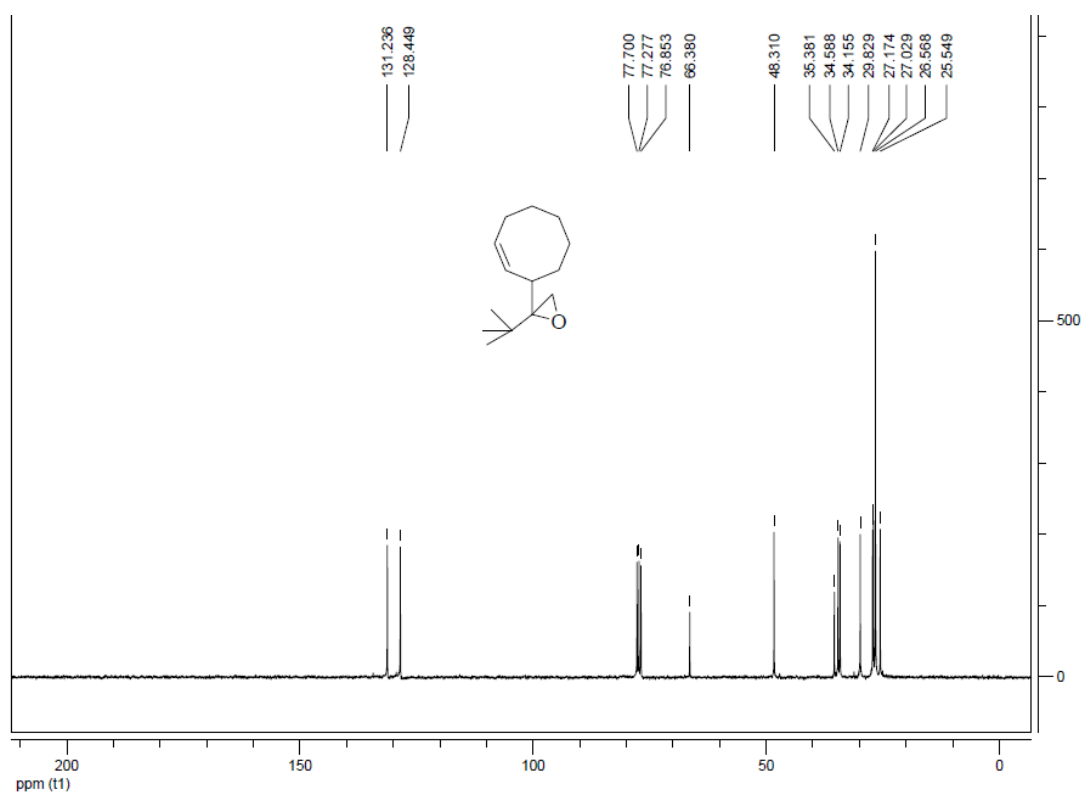



(3e)

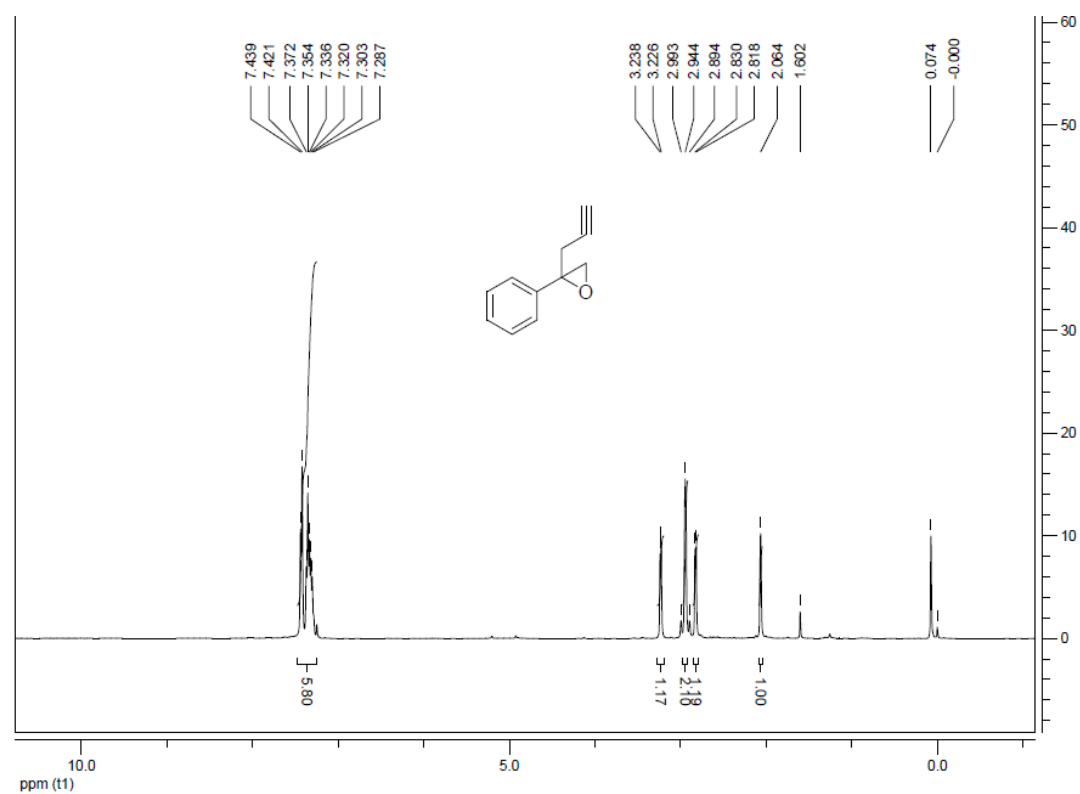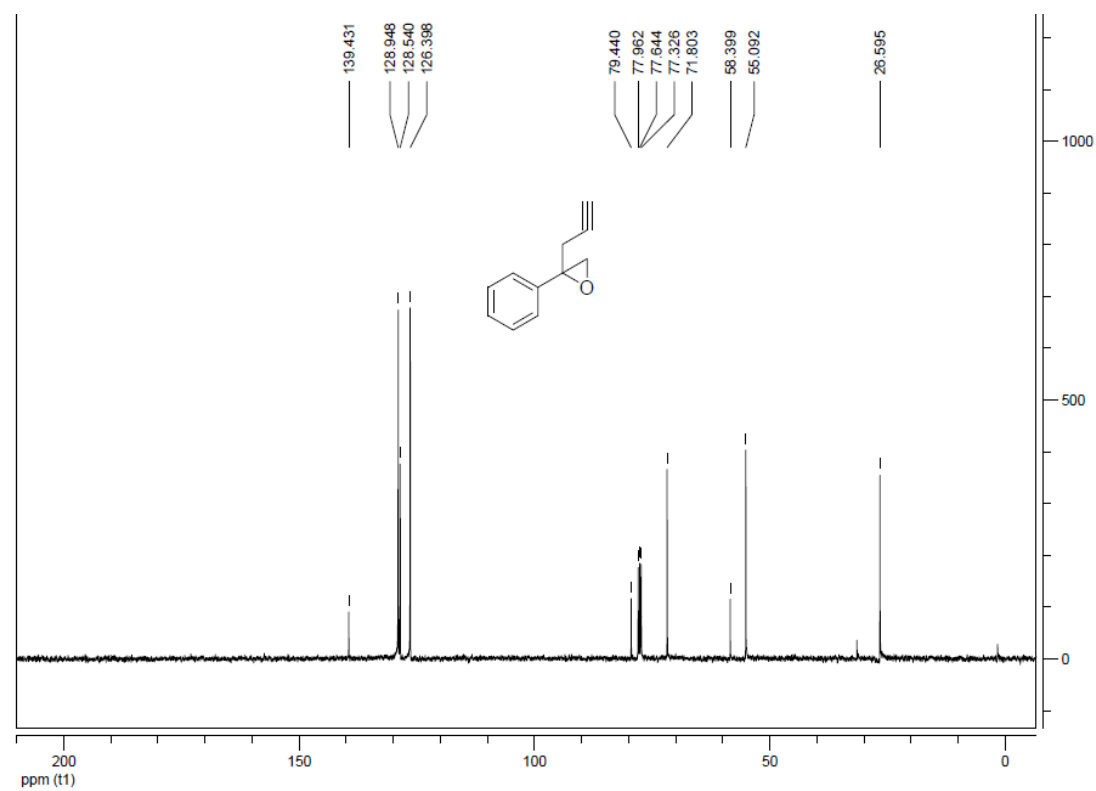

(6a)

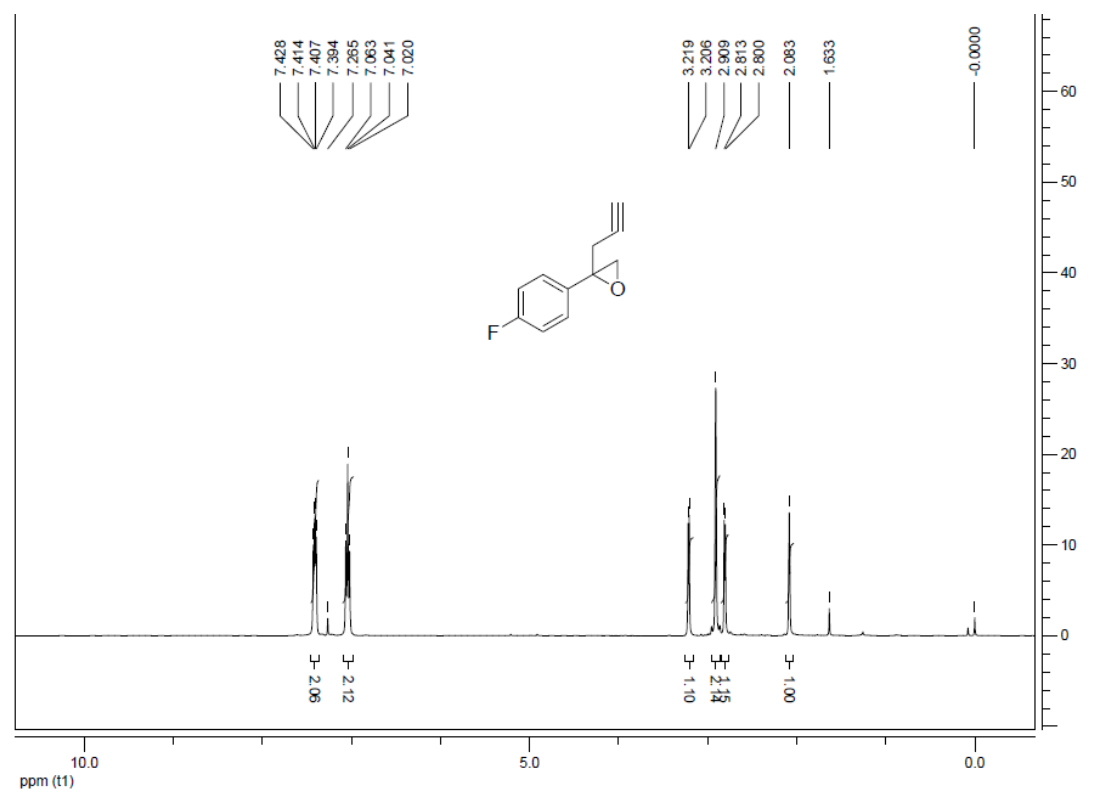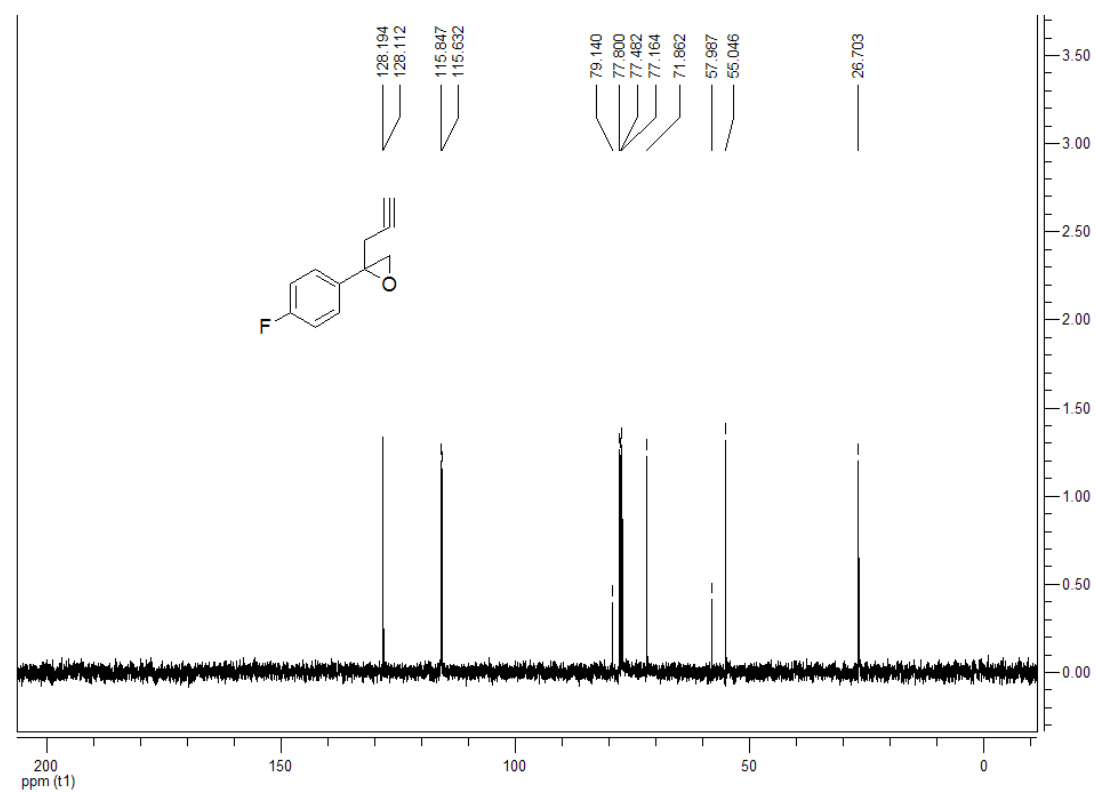

(6b)

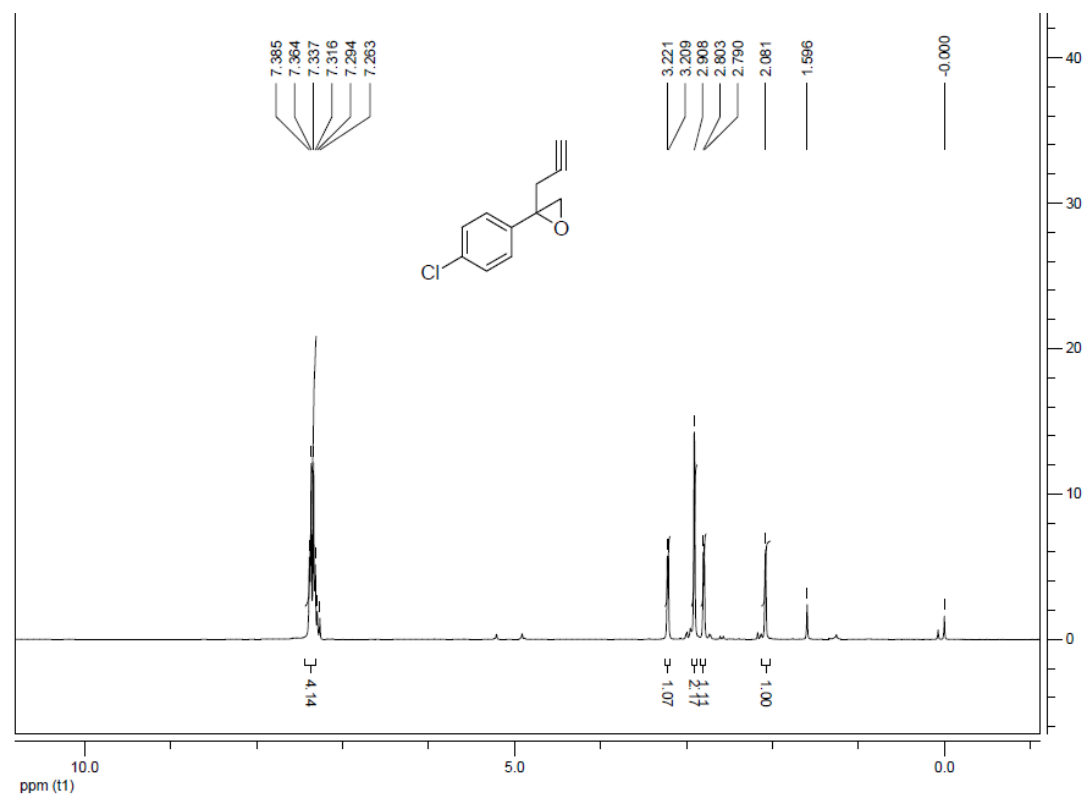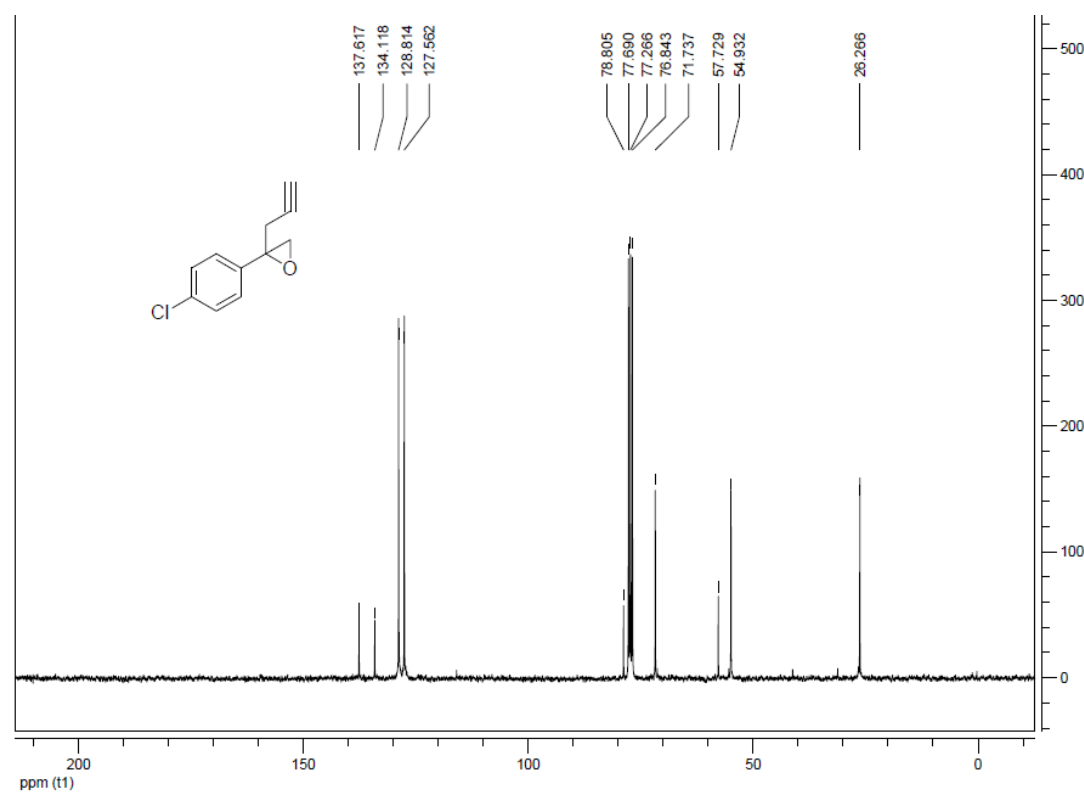

(6c)

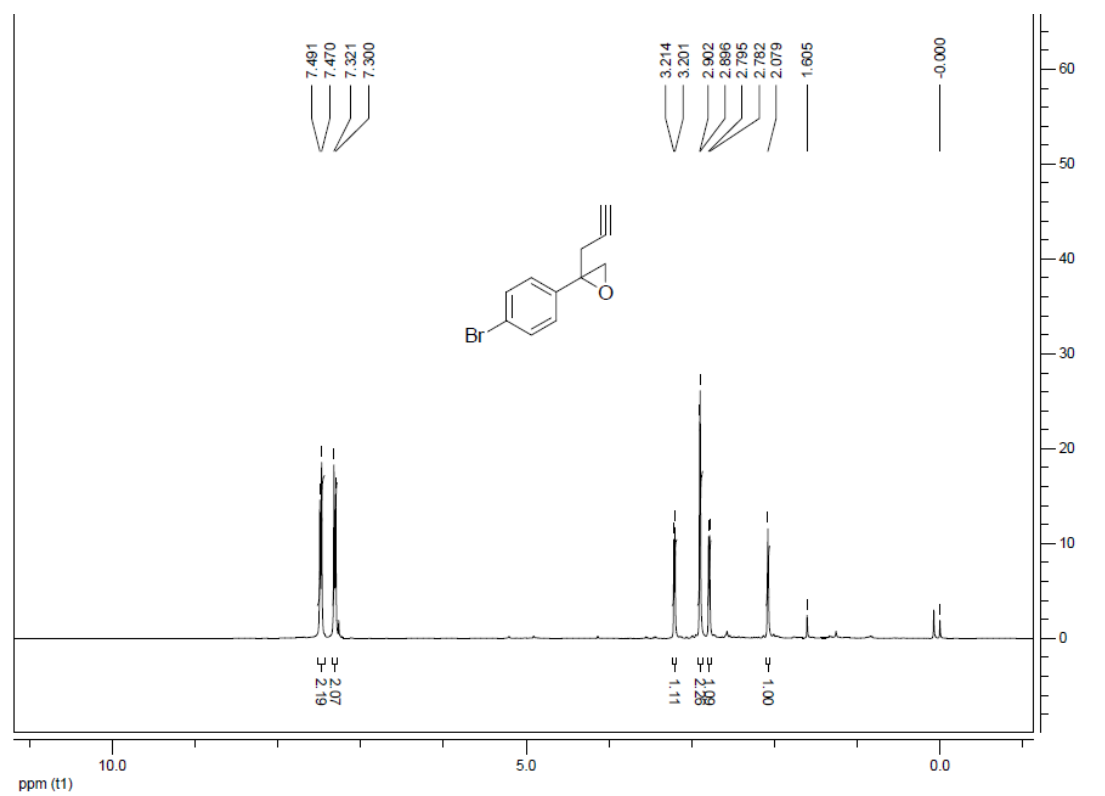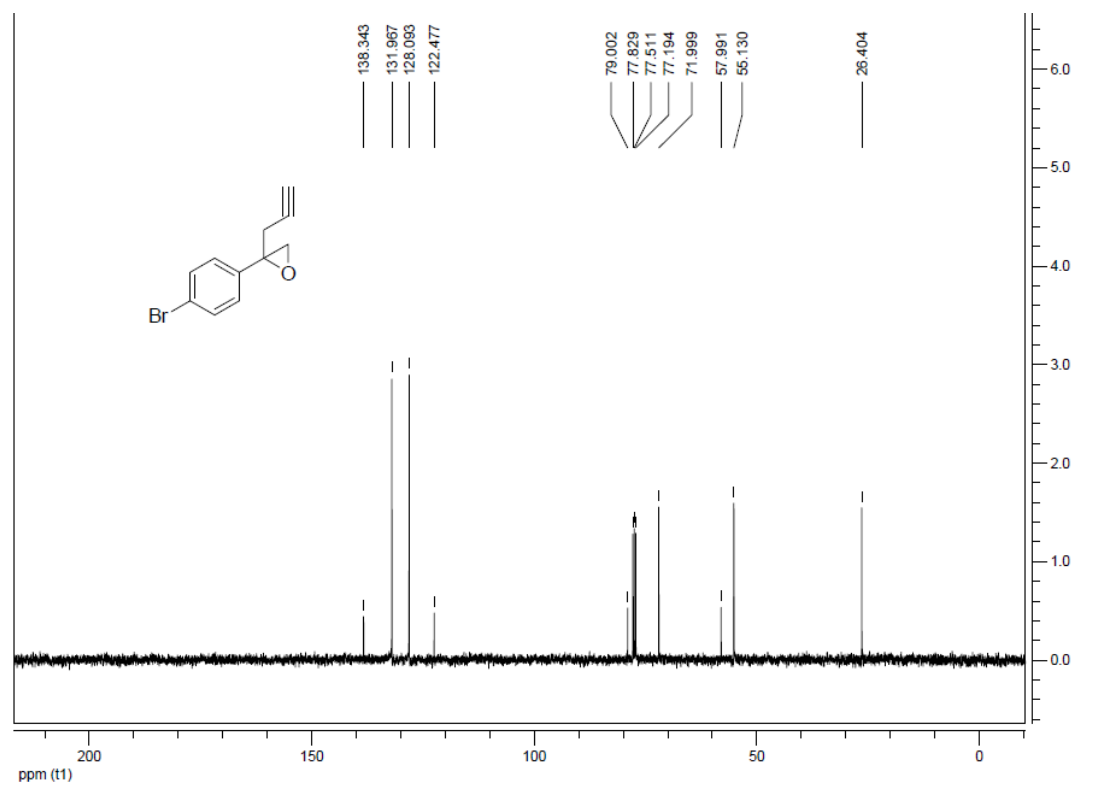

(6d)

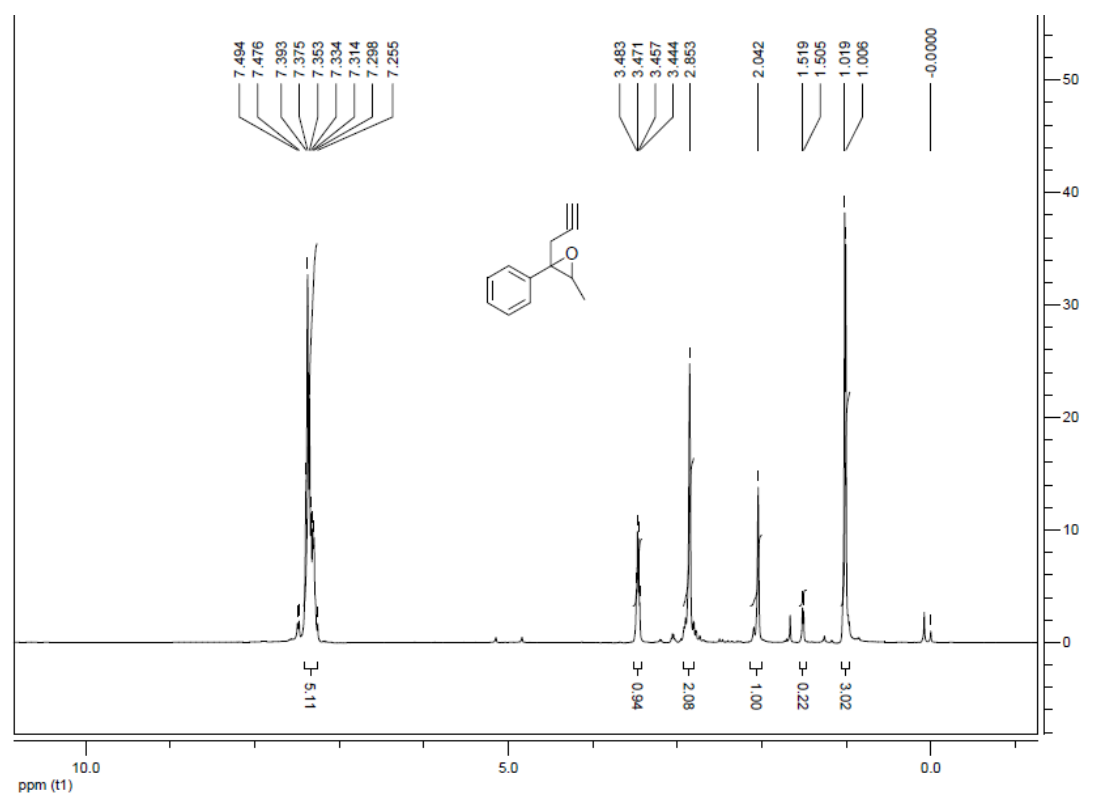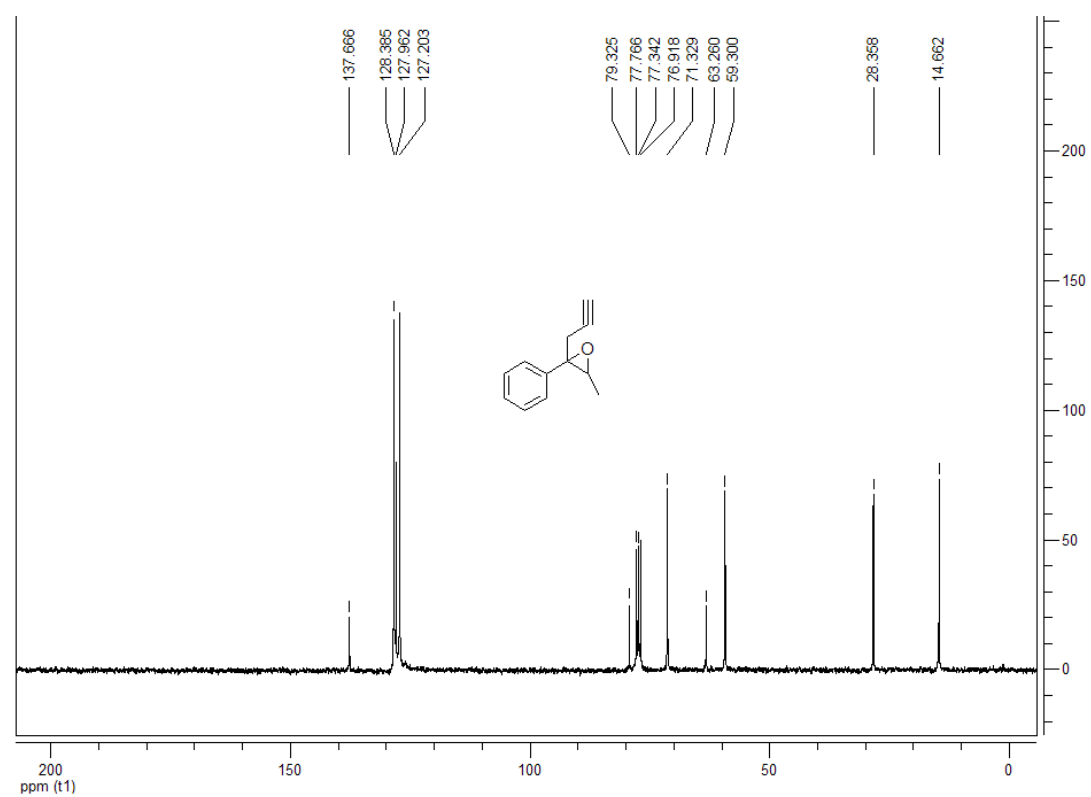

(6e)

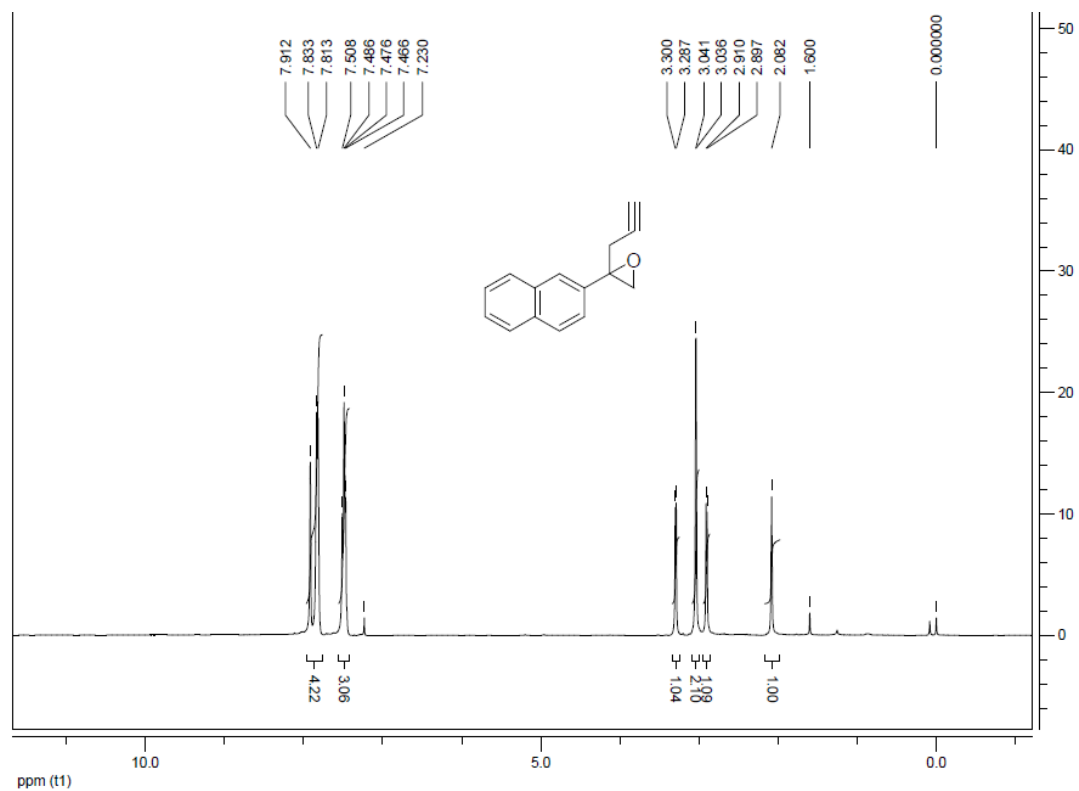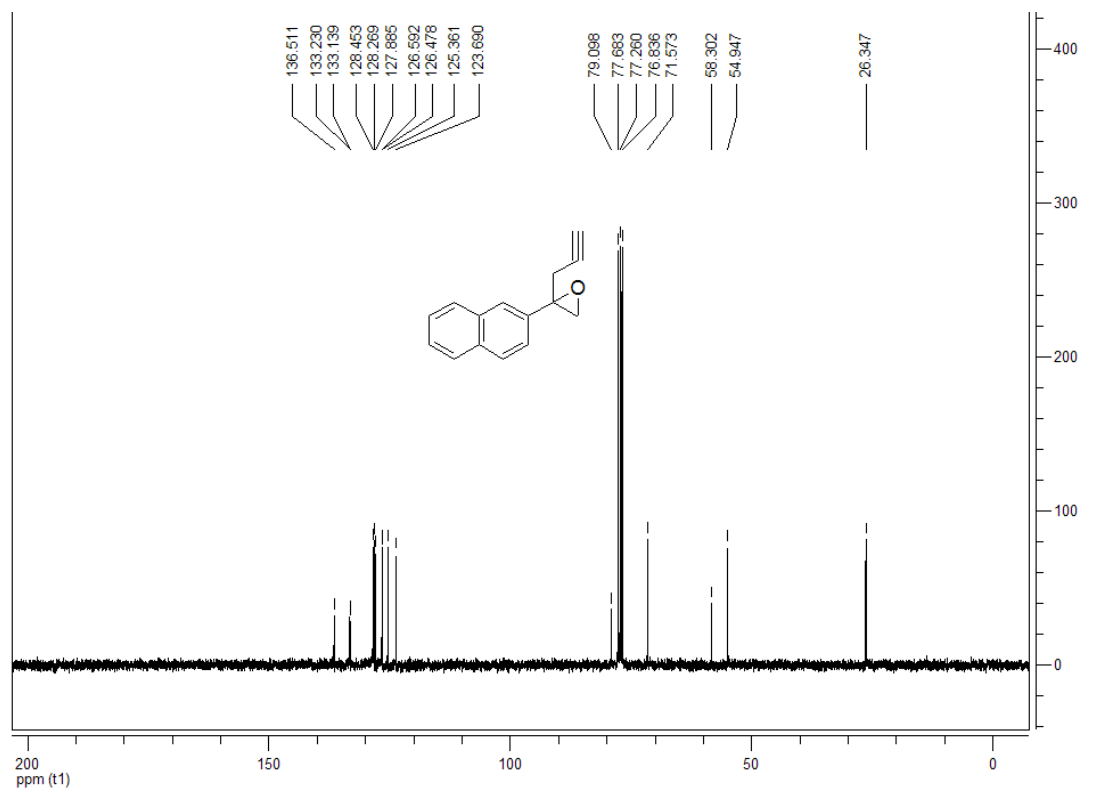

### 3-bromocyclohex-1-ene

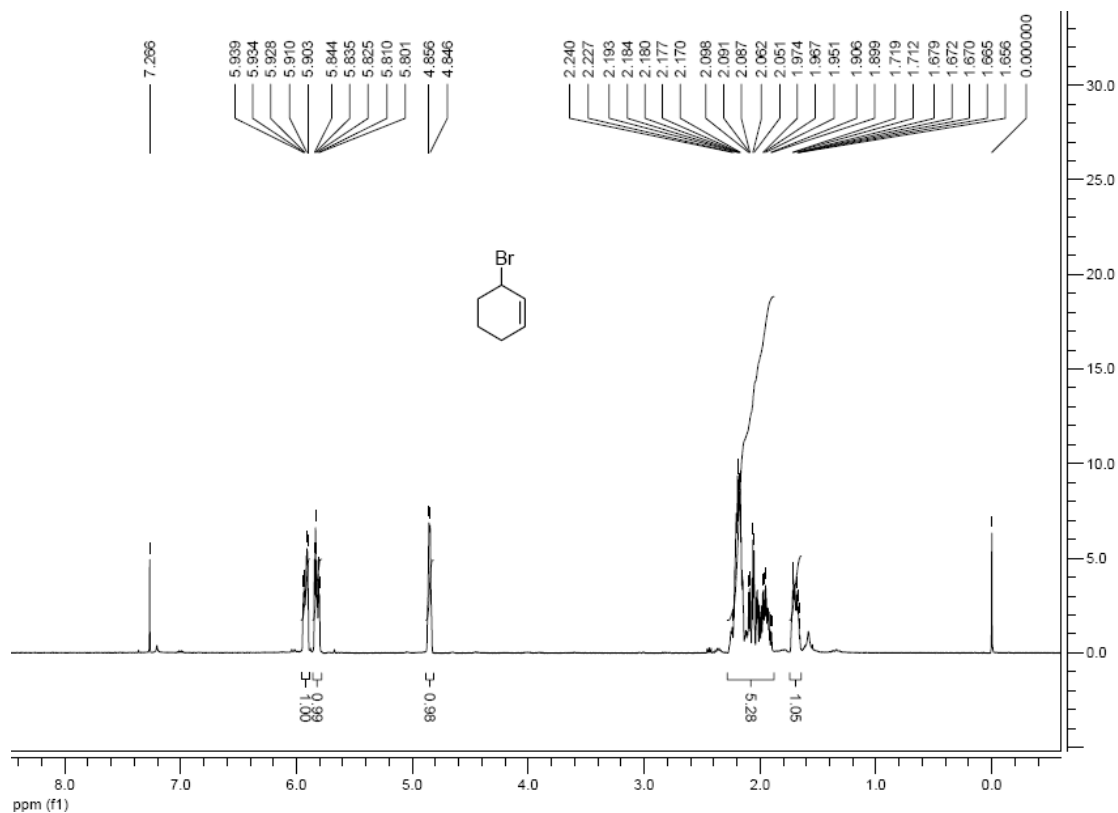

### (Z)-3-bromocyclooct-1-ene

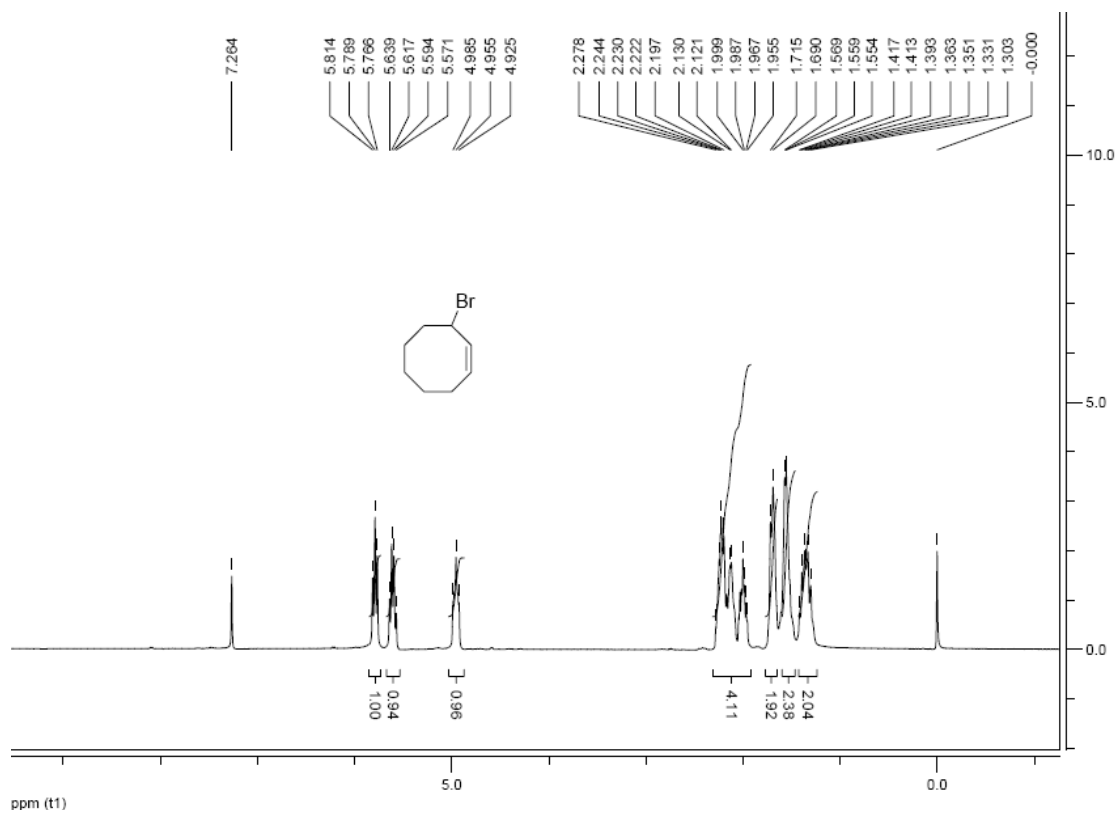

### 1-(3-bromoprop-1-enyl)benzene

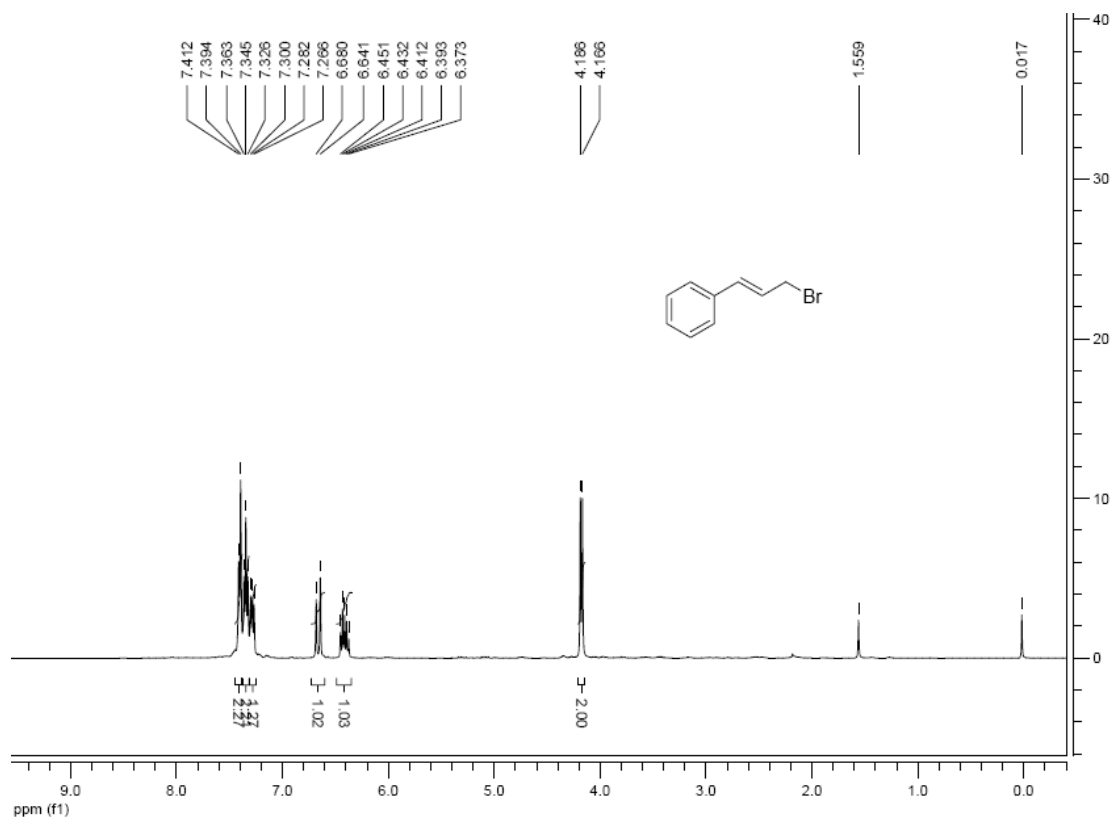

Supplement: c1ob06071f.pdf [file c1ob06071f.pdf]
